# 1                   **MicroED structure of lipid-embedded mammalian** 2                   **mitochondrial voltage dependent anion channel**

3  
4 Michael W. Martynowycz,<sup>1,2,3</sup> Farha Khan,<sup>2</sup> Johan Hattne,<sup>1,2,3</sup> Jeff Abramson,<sup>2</sup> Tamir Gonen<sup>1,2,3,\*</sup>

5  
6 1. Department of Biological Chemistry, University of California Los Angeles, 615 Charles E Young Drive  
7 South, Los Angeles, CA 90095

8 2. Department of Physiology, University of California Los Angeles, 615 Charles E Young Drive South, Los  
9 Angeles, CA 90095

10 3. Howard Hughes Medical Institute, University of California Los Angeles, Los Angeles, CA90095

11 \*To whom correspondence should be sent: [tgonen@g.ucla.edu](mailto:tgonen@g.ucla.edu)

## 12 13 **Keywords**

14 Electron cryo-microscopy (cryoEM); FIB-SEM; MicroED; membrane proteins; bicelle  
15 crystallization; microcrystal electron diffraction

16  
17  
18  
19  
20  
21 **Short title:** Lipid-embedded membrane proteins by MicroED

## 1 **Abstract**

2 A near-atomic resolution structure of the mouse voltage dependent anion channel (mVDAC) is  
3 determined by combining cryogenic focused ion-beam (FIB) milling and microcrystal electron  
4 diffraction (MicroED). The crystals were grown in a viscous modified bicelle suspension which  
5 limited their size and made them unsuitable for conventional X-ray crystallography. Individual thin,  
6 plate-like crystals were identified using scanning electron microscopy (SEM) and focused ion-  
7 beam (FIB) imaging at high magnification. Three crystals were milled into thin lamellae. MicroED  
8 data were collected from each lamellae and merged to increase completeness. Unmodelled  
9 densities were observed between protein monomers, suggesting the presence of lipids that likely  
10 mediate crystal contacts. This work demonstrates the utility of milling membrane protein  
11 microcrystals grown in viscous media using a focused ion-beam for subsequent structure  
12 determination by MicroED for samples that are not otherwise tractable by other crystallographic  
13 methods. To our knowledge, the structure presented here is the first of a membrane protein  
14 crystallized in a lipid matrix and solved by MicroED.

15

## 16 **Introduction**

17 Determining the crystal structures of membrane proteins embedded in lipids is challenging. A  
18 bottleneck in this process for traditional X-ray crystallography is growing large, well-ordered  
19 crystals that incorporate ordered or semi-ordered lipids. In contrast to soluble proteins, membrane  
20 proteins have both hydrophobic and hydrophilic regions on their surface, making them difficult to  
21 handle. To overcome this, membrane proteins are frequently solubilized with detergent and then  
22 crystallized but during this process the lipids, that often play critical roles in the structure and  
23 function of membrane proteins, are lost (Hunte and Richers, 2008). For this reason several  
24 methods were developed for crystallizing membrane proteins within a lipid matrix, for example the

1 lipidic cubic phase and bicelle crystallization (Cherezov, 2011; Faham and Bowie, 2002; Landau  
2 and Rosenbusch, 1996; Ujwal and Abramson, 2012). Viscous media such as lipids or  
3 lipid/detergent mixtures are used to mimic the hydrophobic environment of a lipid bilayer. This  
4 viscous media cannot be easily blotted away using traditional cryoEM blotting methods. Several  
5 attempts have been made to circumvent the blotting method by only depositing nano liter volumes  
6 by pin printing (Ravelli et al., 2020), vacuuming away the excess media using a pressure  
7 differential (Zhao et al., 2019), using liquid wicking grids (Tan and Rubinstein, 2020), and  
8 changing the phase of the media using other less viscous detergents (Zhu et al., 2020a). These  
9 approaches have been successful in many cases for soluble proteins. However, the forces  
10 involved could either dehydrate the membrane protein crystals or permanently damage the lattice.  
11 It is preferable to leave membrane protein crystals in their mother liquor and freeze them as  
12 quickly as possible to best preserve their hydration and crystalline order.

13         Prior reports of membrane protein structures determined using MicroED were conducted  
14 on crystals of the Ca<sup>2+</sup> ATPase (Yonekura et al., 2015) and the non-selective ion channel, NaK  
15 (Liu and Gonen, 2018). Thin 3D crystals of Ca<sup>2+</sup> ATPase were grown by dialysis of isolated protein  
16 against detergent-free buffer to slowly remove excess detergent. As the detergent was removed  
17 ordered layers of lipid-Ca<sup>2+</sup> ATPase formed and slowly began to stack resulting in thin 3D crystals.  
18 These crystals were only a few layers thick making them suitable for analysis by MicroED but they  
19 represent a special case where 3D crystals formed serendipitously from stacked 2D crystals.  
20 Moreover, this crystallization method required large amounts of purified protein and crystal growth  
21 was slow and laborious. In sharp contrast, microcrystals of NaK were identified in conditions using  
22 detergents out of a sparse matrix. The crystals formed as small cubes containing only ~1000  
23 diffracting units. Because the crystals grew out of a detergent solution, without any lipids, they  
24 were easy to pipette and excess solution blotted easily for cryoEM grid preparation using standard  
25 vitrification equipment (Dubochet et al., 1985). In both examples, the resulting crystals were

1 thinner than ~500nm so sample preparation for MicroED including data collection were straight  
2 forward. However, it is preferable to study membrane proteins with lipids rather than in detergent  
3 (Jiang and Gonen, 2012). Crystallization of membrane proteins in lipidic cubic phase or in lipid  
4 bicelles regularly yield crystals in the 2-5 $\mu$ m range and these are too small for traditional X-ray  
5 crystallography and are too large for MicroED. Moreover, the thick lipid matrix renders such  
6 samples almost impossible to prepare by traditional blotting methods for cryoEM because the lipid  
7 matrix is viscous and integrated into the crystal. If blotting is inefficient the sample becomes too  
8 thick for the electrons to penetrate thus eliminating the ability to perform a MicroED experiment.  
9 Strategies for diluting the thick lipid matrix around crystals were recently described using soluble  
10 proteins but when applied to membrane proteins the quality of the crystals rapidly deteriorated  
11 resulting in low resolution data at best (Zhu et al., 2020b).

12 The voltage dependent anion channel, VDAC, is a mammalian membrane protein that  
13 resides on the mitochondrial outer membrane. Traditionally, VDAC crystals have been studied in  
14 both detergent (Bayrhuber et al., 2008; Meins et al., 2008) and within a lipid matrix (Choudhary  
15 et al., 2014; Schredelseker et al., 2014; Ujwal et al., 2008) by X-ray crystallography with and  
16 without bound ATP. The 31 kDa polypeptide begins with a short N-terminal  $\alpha$ -helix that is  
17 surrounded by 19  $\beta$ -strands that pack against one another forming a large barrel-like structure  
18 surrounding a hydrophilic pore. The pore of the channel allows cargo up to 5kDa in size to traverse  
19 the mitochondrial membrane. Further analyses have identified neurosteroid and cholesterol  
20 binding sites (Cheng et al., 2019) and unique roles for individual amino acids and the  
21 corresponding lipidic environment (Bergdoll et al., 2018; Betaneli et al., 2012; Rostovtseva and  
22 Bezrukov, 2008). Crystallization efforts aimed at determining the structure of mutant mVDAC  
23 protein in a modified lipid matrix were stymied because only small crystals, almost  
24 indistinguishable by eye, were obtained and efforts to increase their size for traditional X-ray  
25 crystallography were unsuccessful, making this an ideal specimen for investigation by MicroED.



1 Samples in MicroED are prepared similarly to other modalities of cryoEM (Nannenga et  
2 al., 2014b; Shi et al., 2016). Briefly, a small amount of liquid is added to a TEM grid, the grid is  
3 gently blotted to remove the excess solvent, vitrified in liquid ethane, and stored in liquid nitrogen  
4 for future investigation. However, only crystals that happened to be very thin (<500nm) or could  
5 be fragmented by sonication or vortexing were amenable to MicroED data collection strategies  
6 (de la Cruz et al., 2017; Martynowycz et al., 2017). Unfortunately, membrane protein crystals  
7 rarely form crystals thin enough for MicroED. These crystals tend to be more delicate and do not  
8 survive the harsh sonication/vortexing treatment so new sample preparation methods are  
9 required. Recently, the use of a Focused-Ion Beam on a Scanning Electron Microscope (FIB-  
10 SEM) was demonstrated as a viable sample preparation technique for MicroED (Duyvesteyn et  
11 al., 2018; Martynowycz et al., 2019a, 2019b) (Figure 1). With this method, an SEM is used to  
12 identify crystals and a FIB is used to thin the crystals to <500nm thickness creating the ideal  
13 samples for MicroED. Recently two reports, one published and one posted online, attempted to  
14 determine the MicroED structure of a membrane protein embedded in LCP but were not  
15 successful likely because the sample preparation methods were not optimized (Zhu et al., 2020b;  
16 Polovinkin et al., 2020). Importantly, to date FIB milling coupled with successful structure  
17 determination by MicroED has only been demonstrated for soluble standard proteins, such as  
18 lysozyme and proteinase K (Beale et al., 2020; Duyvesteyn et al., 2018; Li et al., 2018;  
19 Martynowycz et al., 2019a, 2019b; Wolff et al., 2020; Zhou et al., 2019).

20 Here, we demonstrate the application of FIB milling on membrane protein crystals of  
21 mVDAC grown in modified lipid bicelles. Three mVDAC crystals embedded in thick bicelle media  
22 were located in the FIB/SEM and milled into ~200nm thick lamellae. MicroED data were collected  
23 and merged to 80% completeness at 3.1 Å resolution. The structure of mVDAC was solved by  
24 molecular replacement using a wild type VDAC model. Evidence for lipid packing between  
25 mVDAC monomers was visible in the density map. Our results demonstrate that membrane

1 protein crystals embedded in dense, viscous media can be made amenable to MicroED  
2 investigation by cryoFIB milling, increasing the scope of the method to include more challenging  
3 and biologically important membrane proteins grown in a lipid matrix.

4

## 5 **Results and Discussion**

6 Crystals of mVDAC were grown in modified bicelles in a similar manner as previously described  
7 (Ujwal et al., 2008) with subtle changes to lipid composition. In this condition, only very small and  
8 thin plate-shaped microcrystal shards were formed within a dense core of a thick and viscous lipid  
9 matrix (Figure 2, inset). These microcrystals were difficult to harvest from inside the dense bicelle  
10 core in the drop to attempt traditional X-ray crystallography and despite significant effort could not  
11 grow larger for analysis by X-ray crystallography. We therefore explored the use of MicroED.

12         Preparing grids of mVDAC for MicroED analyses proved to be challenging because of the  
13 lipid-matrix in the crystallization drops. These were viscous and difficult to handle. The steps we  
14 took for optimizing sample preparation of mVDAC crystals in the lipid matrix for MicroED are  
15 documented in Supplementary Figures 1-9. With every step the grid preparation improved and  
16 the resulting data that was obtained likewise improved leading to high quality data (Table 1) that  
17 had high signal to noise ratio (Supplementary Figure 9). We first attempted to prepare grids for  
18 MicroED by depositing an entire crystal drop onto the TEM grid and gently blotting from the  
19 opposite side as described (Martynowycz and Gonen, 2020). These attempts resulted in samples  
20 that were completely opaque and could not be penetrated by the electron beam. At this point we  
21 decided to explore the use of a FIB SEM to thin the crystalline material and its surrounding to  
22 thicknesses that are ideal for MicroED. Maintaining the grids in a humidity chamber held at ~35%  
23 during blotting resulted in grids with large amorphous material and no visible crystals. Blotting  
24 from the front and the back typically broke the windows on the grid and all crystalline material was

1 lost. Grids with less material but visible crystal edges poking through piles of amorphous material  
2 were identified by adding mother liquor to the grid prior to blotting at ambient humidity and then  
3 rinsing the grids with additional mother liquor and blotting a second time. This double washing  
4 step allowed us to identify crystalline material but mostly led to poor or no diffraction so we surmise  
5 that the crystalline lattice was damaged by the harsh treatment.

6         The breakthrough for MicroED sample preparation occurred when the samples were kept  
7 hydrated. We added additional mother liquor on top of the crystal drops to reduce evaporation  
8 and minimize lipid exposure to environmental air. In addition, the cryoEM grid was wetted with  
9 2 $\mu$ L of mother liquid inside of a vitrification robot operating at room temperature and 90% humidity  
10 and 4°C to prevent any dehydration during sample application. Approximately 0.5 $\mu$ L of the central  
11 crystal/lipid matrix was carefully pipetted onto the wet grid. The sample was incubated for 20s  
12 and then gently blotted—from behind—and immediately plunged into super cooled liquid ethane  
13 for vitrification. Grids were transferred under cryogenic conditions for further investigation using  
14 FIB-SEM. Grids with mVDAC crystals were inspected by SEM. Upon Visual inspection, the grid  
15 appeared to be covered with a thick layer of material which impeded crystal identification (Figure  
16 1a). Upon careful inspection at high magnification, thin mVDAC crystals were observed under the  
17 thick lipid matrix (Figure 1a, arrow and b, outline).

18         Milling the mVDAC crystals was conducted similarly to prior reports (Martynowycz et al.,  
19 2019a, 2019b) with important modifications. We noticed that the viscosity and thickness of the  
20 lipid matrix afforded considerable challenges for milling the crystals while minimizing radiation  
21 damage or destruction of the underlying crystalline lattice. To determine the total thickness of the  
22 preparation, we first milled trenches in front and behind the target crystal. These trenches were  
23 milled at a high angle of 35°, compared with the typical milling angle of ~12°. The high milling  
24 angle facilitated the examination of the specimen to decide on milling trajectory and strength  
25 (Figure 1c). After trenching, three mVDAC crystals were milled at a maximum angle of 30°. The

1 milling angle was adjusted to assure the crystals would be accessible after rotating the grid for  
2 inspection in the TEM. Milling was conducted in sections either above or below the crystal for  
3 short periods of time and low currents to prevent overheating the sample and damaging the lattice.  
4 We observed that even short bursts of higher currents would over-expose the crystals, destroying  
5 the underlying lattice and resulting in little or no diffraction. This observation is in sharp contrast  
6 with crystals of soluble proteins that appear to withstand much greater currents and still provide  
7 atomic resolution data (Martynowycz et al., 2019b). Therefore, to minimize radiation damage to  
8 membrane protein crystals, the ion-beam current was ramped down in steps as the milling  
9 progressed (Martynowycz et al., 2019a, 2019b). After a polishing step a thin ~200nm crystalline  
10 lamellae remained (Figure 1d) and the preparation was transferred to a cryo TEM for MicroED.

11

12 **MicroED data collection, analysis and structure determination.** The milled lamella were  
13 loaded onto a 300kV Titan Krios equipped with a CMOS CetaD. Lamella were easy to identify in  
14 the TEM. They appeared as a bright stripe against an otherwise black background (Figure 3a).  
15 Five hydrated mVDAC lamellae were tested in the Titan Krios, and, to our surprise, 60% of the  
16 lamellae diffracted well to approximately 3Å resolution (Figure 3a). Even more surprising, we were  
17 able to cover a large portion of the reciprocal space per crystal lamella at that resolution (Figure  
18 3, video). For the fastest MicroED movie, the accumulated exposure was less than 2 e<sup>-</sup> Å<sup>-2</sup> total  
19 dose.

20 The continuous rotation MicroED data were saved as MRC files and converted to SMV  
21 format using an in-house program that is freely available (<https://cryoem.ucla.edu/MicroED>).  
22 Images were processed in XDS (Kabsch, 2010a), with the negative pixels being lifted using a  
23 pedestal of 512 as previously described (Hattne et al., 2016, 2015). The space group was  
24 identified to be C 1 2 1 (#5), with a unit cell of (a, b, c) = (98.9 58.21 69.54), and (α, β, γ) = (90,  
25 99.44, 90), which was very similar to the crystallographic parameters of the wild type mVDAC

1 (Ujwal et al., 2008). A resolution cutoff was applied at 3.1Å, with an overall completeness of 80%  
2 (Table 1). Merging data from additional crystals did not increase the completeness because the  
3 mVDAC crystals have a preferential orientation on the grid. This observation was made previously  
4 using catalase crystals which also formed flat plates and had a preferential orientation (Nannenga  
5 et al., 2014a). The structure of mVDAC was solved by molecular replacement using the wild type  
6 model of VDAC (PDB accession code 3EMN). A single solution was found with a TFZ and LLG  
7 of 19 and 660, respectively. Following molecular replacement, the structure was inspected in  
8 COOT (Emsley and Cowtan, 2004) and refined.

9           Refinement of mVDAC followed standard procedures (Hattne et al., 2015; Shi et al., 2016).  
10 The model from molecular replacement was refined using electron scattering factors in PHENIX  
11 (Afonine et al., 2012). Model building and refinement were done iteratively until the refinement  
12 converged. The resulting  $R_{\text{work}}$  and  $R_{\text{free}}$  were 25% and 28%, respectively. The final model of  
13 mVDAC contains an N-terminal  $\alpha$ -helix surrounded by a bundle of 19  $\beta$ -sheets forming a barrel  
14 that encloses a hydrophilic pore (Figure 4a, 4b, video). This structure is similar to the wild type  
15 mVDAC with an all atom RMSD of 0.65 Å<sup>2</sup>.

16           The packing of mVDAC monomers within the crystal lattice involved direct protein-protein  
17 contacts as well as contacts mediated by lipids. The different contact sites exist because  
18 individual mVDAC barrels do not pack as a planar hexagonal lattice as one would predict for a  
19 round monomer. Instead, each monomer makes a close contact with three monomers, and more  
20 distant contacts with an additional four monomers in a planar arrangement (Figure 5a). The three  
21 nearest neighbors of an mVDAC monomer are close enough for direct protein-protein crystal  
22 contacts but the other 4 neighboring barrels are too far, separated by up to 34 Å from one another.  
23 The spaces in between these distant mVDAC barrels are filled with lipids which act as glue to  
24 mediate crystal contacts (Figure 5b). We chose not to model the lipids at this stage because at  
25 this resolution we only observed discontinuous density for the lipid moieties. Lipids have been

1 observed to mediate crystal contacts in other membrane protein studies. For example, the  
2 structure of the aquaporin-0 mediated membrane junction that was determined by electron  
3 diffraction from double layered crystals (Gonen et al., 2005, 2004). Lipids that mediated the crystal  
4 contacts were only observed once the resolution reached atomic resolution (Gonen et al., 2005)  
5 but were otherwise left unmodelled at the initial 3Å resolution study as the lipid densities were  
6 likewise fragmented (Gonen et al., 2004).

7

## 8 **Concluding Remarks**

9 We have demonstrated a structure solution of a mammalian membrane protein grown in a  
10 modified lipidic environment that was not tractable by other crystallographic methods. While wild  
11 type mVDAC readily grows large crystals suitable for X-ray crystallography, the crystals here were  
12 barely visible and not amenable to analysis by X-ray crystallography. These crystals grew in a  
13 thick modified lipid matrix that made isolating crystals for MicroED challenging. In this case, FIB  
14 milling was necessary to remove excess material and allow structure determination by MicroED  
15 once crystal hydration was maintained during grid preparation. The MicroED structure was solved  
16 from a single crystalline volume of less than  $1\mu\text{m}^3$ , which is not possible using synchrotron X-ray  
17 crystallography. Finally, as future studies will focus on improving the resolution of this approach  
18 we expect to fully resolve the lipids that mediate crystal contacts in these, and, in the future, other  
19 crystals of membrane proteins grown in a lipid matrix and studied by MicroED. This combination  
20 of methodologies could open the door to investigating the influence of lipids on membrane protein  
21 structure and function in ways that were previously not possible.

22

23

## 1 **Materials and Methods**

2 **Contact for reagent and resource sharing.** Further information and requests for resources and  
3 reagents should be directed to and will be fulfilled by the lead contact, Tamir Gonen  
4 ([tgonen@g.ucla.edu](mailto:tgonen@g.ucla.edu)).

5  
6 **Protein production and purification.** Lipid bicelles were prepared as described before (Faham  
7 and Bowie, 2002). Mutant VDAC was expressed and purified as described (Ujwal et al., 2008).  
8 Purified mVDAC was concentrated to 15 mg/ml, and mixed in a 4:1 protein/bicelle ratio with a  
9 modified bicellar solution, resulting in 12 mg/ml mVDAC1 in 7% bicelles.

10 **Protein crystallization.** Crystal screens for mVDAC started from the known crystallization  
11 conditions conducted at 20°C (Ujwal et al., 2008) and modified for crystal growth. Microcrystals  
12 appeared in a well containing 20% MPD, 0.1 M Tris·HCl (pH 8.5) with 10% PEG400 added to the  
13 protein drop only.

14 **Grid preparation.** Quantifoil R2/2 Cu200 grids were glow discharged for 30s prior to use. The  
15 blotting chamber was set to 18°C and 90% humidity, and filter paper was added. The system was  
16 allowed to equilibrate for 15 mins before any blotting was conducted. 2µL of mother liquid was  
17 added to the grid inside of a vitrification robot to prevent any dehydration during application. A  
18 small portion (~0.5µL) from the central lipid clump within the crystallization drop was pipetted  
19 carefully into the already applied 2µL of mother liquor. The sample chamber of the vitrification  
20 robot was held at 90% humidity. This mixture was allowed to incubate for 20s, and was then  
21 gently blotted from the back and immediately vitrified in liquid ethane as described (Martynowycz  
22 and Gonen, 2020). Grids were transferred and stored in liquid nitrogen prior to further  
23 investigation.

24

1 **Cryo-SEM imaging and Cryo-FIB milling of VDAC.** All FIB/SEM experiments were performed  
2 on a Thermo-Fisher Aquilos dual-beam FIB/SEM instrument at liquid nitrogen temperatures as  
3 described (Duyvesteyn et al., 2018; Martynowycz et al., 2019a, 2019b; Wolff et al., 2020). The  
4 instrument was operated at 2kV and 3.1pA while using the SEM for imaging, and 30kV and 1.5  
5 or 10pA while operating the FIB beam for imaging. The grid was sputter coated in platinum for  
6 ~1min using a high current in order to apply a 500nm thick layer of platinum evenly over the entire  
7 grid. An all-grid map was collected in the MAPS software (Thermo-Fisher), where potential  
8 crystals were identified by looking for sharp edges in areas not over the grid bars. Each grid  
9 square was individually inspected again using the FIB at 1.5-10pA current to verify the already  
10 selected crystals or identify new crystals. Verified mVDAC crystals were brought to eucentric  
11 height prior to milling. Milling was conducted as described. In general, milling was done in batch,  
12 where each step of rough, fine, and ultra-fine (or, polishing) were conducted on each crystal prior  
13 to additional thinning. In this way, contamination of the lamellae by amorphous ice was minimized.

14

15 **MicroED data collection.** Data collection was performed as described (Hattne et al., 2015;  
16 Martynowycz et al., 2019a; Nannenga et al., 2014b; Shi et al., 2013). MicroED was tested on a  
17 200kV Talos Arctica equipped with a Ceta-D CMOS. Individual diffraction patterns were collected  
18 from each lamella without rotation to evaluate the quality of diffraction that could be obtained.  
19 Data were collected on a cryogenically cooled Titan Krios operating at 300kV, corresponding to  
20 an electron wavelength of 0.0197Å. Lamellae were identified in low-magnification montage taken  
21 at approximately 64x magnification on a Ceta-D camera (Thermo-Fisher). Data were collected  
22 under continuous rotation from the three lamellae at rotation speeds between 0.1-0.3 ° s<sup>-1</sup> with  
23 frames being read out at every 5, 3, and 2s. The general strategy was to collect data with  
24 individual wedges corresponding to approximately 0.5°. The exposure rate was set to less than  
25 0.01 e<sup>-</sup> Å<sup>-2</sup> s<sup>-1</sup> to limit radiation damage (Hattne et al., 2018). Data were recorded using a selected



1 area aperture that limited the exposed area to region approximately 2 $\mu$ m in diameter. Since the  
2 lamella thickness was merely ~200nm the MicroED data was collected from a crystalline volume  
3 of less than 1 $\mu$ m<sup>3</sup>. Data were saved as single MRC stacks prior to data analysis.

4

5 **MicroED data processing.** Data were converted from MRC to SMV format using software that  
6 is freely available (<https://cryoem.ucla.edu/>). Converted frames were used to index, integrate, and  
7 scale the collected in XDS and XSCALE (Kabsch, 2010a, 2010b). Individual datasets were  
8 optimized by removing frames from the end to improve the scaling between the three datasets. A  
9 resolution cutoff was applied at 3.1Å, where the CC<sub>1/2</sub> of the merged data remained positive.  
10 Further reduction of the resolution could be done during refinement based upon the refinement  
11 statistics. Molecular replacement was performed in PHASER (McCoy et al., 2007) using the PDB  
12 search model 3EMN (Ujwal et al., 2008) and the merged intensities. A single solution was  
13 identified using PHASER in space group C 1 2 1, or #5. The initial model from PHASER was  
14 inspected in coot (Emsley and Cowtan, 2004) prior to refinement. Refinement was conducted by  
15 PHENIX.REFINE using electron scattering factors (Adams et al., 2011). We found that the best  
16 statistics were obtained by not reducing the resolution further, since the outermost shell of our  
17 refinement (3.21 - 3.12) did not have a particularly poor R<sub>free</sub> value (0.36). The structure was left  
18 as-is without further modelling any densities outside of the protein residues, as these are to be  
19 detailed in future work regarding the functional importance of this mutation.

20

21 **Figure preparation.** Figures were arranged in Microsoft Powerpoint and Photoshop 2020;  
22 Chimera X and coot. Images were adjusted and cropped in FIJI (Schindelin et al., 2012). Tables  
23 were arranged in Microsoft Excel. Protein models and meshes were generated using PyMol (*The*

1 *PyMOL molecular graphics system*, 2014). Movies of the density map and structure were  
2 recorded in Chimera X.

3

#### 4 **Acknowledgements**

5 This study was supported by the National Institutes of Health P41GM136508 to T.G. and R35  
6 GM135175 J.A.. The Gonen lab is supported by funds from the Howard Hughes Medical Institute.  
7 The structure factors and coordinates are deposited in the PDB and the associated map in the  
8 EMDB.

9

#### 10 **Author contributions**

11 FK purified and crystallized mVDAC in modified bicelles . MWM prepared cryoTEM grids, did FIB  
12 milling and collected MicroED data. The structure of mVDAC was solved by MWM and FK.  
13 Figures were prepared by JH, TG and MWM. All authors participated in writing and approving the  
14 manuscript. The project was conceived by JA and TG.

#### 15 **Declarations of interests**

16 The authors declare no conflict of interests.

17

18

19

20

21

1 **Figure legends and tables**

2 **Table 1. MicroED Crystallographic Table mVDAC.**

3 **Figure 1. Preparing viscous samples for cryoFIB and MicroED.** Schematic cartoon  
4 demonstrating the steps in the pipeline for studying membrane protein crystals grown in a lipid  
5 matrix by MicroED. Crystals are grown in viscous media, the crystals are transferred in the viscous  
6 media to a wet TEM grid, the grid is blotted and the thick media is left behind. Blotted grids are  
7 transferred into a FIB/SEM for inspection and milling, and finally thin lamellae prepared by FIB  
8 milling are used for MicroED data collection.

9 **Figure 2. Identification of mVDAC microcrystals in the lipid matrix.** (a) FIB image of an  
10 identified crystal prior to milling (arrow), and (b) this same picture with the thin crystal outlined in  
11 blue. (c) SEM image of the final crystalline lamellae milled at 30° showing stratification between  
12 the deposited platinum layer, crystal, and thick bicelle media. (d) FIB image of the final lamellae  
13 in the FIB used to measure thickness. mVDAC crystals were ~200nm thick. Lines indicate top  
14 and bottom of lamella. The crystallization drop with bicelle solution is shown inset in (a).

15 **Figure 3. MicroED data collection from a milled mVDAC lamella.** (a) A maximum intensity  
16 projection through 10 degrees of a MicroED dataset. Strong reflections are easily observed to  
17 ~3Å resolution. Inset: TEM micrograph of crystal lamella used for the data shown. Scale bar is  
18 10um. (b) Movie of a mVDAC MicroED dataset from the same crystal as in (a).

19 **Figure 4. The structure of mVDAC by MicroED.** (a) The final structure of mVDAC at 3.1Å  
20 resolution in side and top views (left and right respectively). (b) Video showing the  $2F_o - F_c$  map of  
21 the entire protein through an entire rotation.

22 **Figure 5. Crystal packing and contacts in mVDAC.** (a) the lattice arrangement of the mVDAC  
23 molecules in the crystal in top and side views (left and right, respectively). (b) The  $2F_o - F_c$  map in  
24 blue between of the protein (yellow) is consistent with lipid molecules that likely mediate crystal  
25 contacts.

## 1   **References**

- 2   Adams PD, Afonine PV, Bunkóczi G, Chen VB, Echols N, Headd JJ, Hung L-W, Jain S, Kapral GJ, Kunstleve  
3         RWG. 2011. The Phenix software for automated determination of macromolecular structures.  
4         *Methods* **55**:94–106.
- 5   Afonine PV, Grosse-Kunstleve RW, Echols N, Headd JJ, Moriarty NW, Mustyakimov M, Terwilliger TC,  
6         Urzhumtsev A, Zwart PH, Adams PD. 2012. Towards automated crystallographic structure  
7         refinement with phenix.refine. *Acta Crystallographica Section D: Biological Crystallography*  
8         **68**:352–367.
- 9   Bayrhuber M, Meins T, Habeck M, Becker S, Giller K, Villinger S, Vornrhein C, Griesinger C, Zweckstetter  
10         M, Zeth K. 2008. Structure of the human voltage-dependent anion channel. *PNAS* **105**:15370–  
11         15375. doi:10.1073/pnas.0808115105
- 12   Beale EV, Waterman DG, Hecksel C, van Rooyen J, Gilchrist JB, Parkhurst JM, de Haas F, Buijsse B, Evans  
13         G, Zhang P. 2020. A Workflow for Protein Structure Determination from Thin Crystal Lamella by  
14         Micro-Electron Diffraction (preprint). *Biophysics*. doi:10.1101/2020.04.30.061895
- 15   Bergdoll LA, Lerch MT, Patrick JW, Belardo K, Altenbach C, Bisignano P, Laganowsky A, Grabe M, Hubbell  
16         WL, Abramson J. 2018. Protonation state of glutamate 73 regulates the formation of a specific  
17         dimeric association of mVDAC1. *Proceedings of the National Academy of Sciences* **115**:E172–  
18         E179.
- 19   Betaneli V, Petrov EP, Schwille P. 2012. The role of lipids in VDAC oligomerization. *Biophysical journal*  
20         **102**:523–531.
- 21   Cheng WW, Budelier MM, Sugasawa Y, Bergdoll L, Queralt-Martín M, Rosencrans W, Rostovtseva TK,  
22         Chen Z-W, Abramson J, Krishnan K. 2019. Multiple neurosteroid and cholesterol binding sites in  
23         voltage-dependent anion channel-1 determined by photo-affinity labeling. *Biochimica et*  
24         *Biophysica Acta (BBA)-Molecular and Cell Biology of Lipids* **1864**:1269–1279.
- 25   Cherezov V. 2011. Lipidic cubic phase technologies for membrane protein structural studies. *Current*  
26         *opinion in structural biology* **21**:559–566.
- 27   Choudhary OP, Paz A, Adelman JL, Colletier J-P, Abramson J, Grabe M. 2014. Structure-guided  
28         simulations illuminate the mechanism of ATP transport through VDAC1. *Nature structural &*  
29         *molecular biology* **21**:626–632.
- 30   de la Cruz MJ, Hattne J, Shi D, Seidler P, Rodriguez J, Reyes FE, Sawaya MR, Cascio D, Weiss SC, Kim SK,  
31         Hinck CS, Hinck AP, Calero G, Eisenberg D, Gonen T. 2017. Atomic-resolution structures from  
32         fragmented protein crystals with the cryoEM method MicroED. *Nat Methods* **14**:399–402.  
33         doi:10.1038/nmeth.4178
- 34   Dubochet J, Adrian M, Lepault J, McDowell AW. 1985. Emerging techniques: Cryo-electron microscopy of  
35         vitrified biological specimens. *Trends in Biochemical Sciences* **10**:143–146.

- 1 Duyvesteyn HME, Kotecha A, Ginn HM, Hecksel CW, Beale EV, de Haas F, Evans G, Zhang P, Chiu W,  
2 Stuart DI. 2018. Machining protein microcrystals for structure determination by electron  
3 diffraction. *Proc Natl Acad Sci USA* **115**:9569–9573. doi:10.1073/pnas.1809978115
- 4 Emsley P, Cowtan K. 2004. *Coot* : model-building tools for molecular graphics. *Acta Crystallogr D Biol*  
5 *Crystallogr* **60**:2126–2132. doi:10.1107/S0907444904019158
- 6 Faham S, Bowie JU. 2002. Bicelle crystallization: a new method for crystallizing membrane proteins  
7 yields a monomeric bacteriorhodopsin structure. *Journal of Molecular Biology* **316**:1–6.  
8 doi:10.1006/jmbi.2001.5295
- 9 Gonen T, Cheng Y, Sliz P, Hiroaki Y, Fujiyoshi Y, Harrison SC, Walz T. 2005. Lipid–protein interactions in  
10 double-layered two-dimensional AQP0 crystals. *Nature* **438**:633–638.
- 11 Gonen T, Sliz P, Kistler J, Cheng Y, Walz T. 2004. Aquaporin-0 membrane junctions reveal the structure of  
12 a closed water pore. *Nature* **429**:193–197.
- 13 Hattne J, Reyes FE, Nannenga BL, Shi D, de la Cruz MJ, Leslie AGW, Gonen T. 2015. MicroED data  
14 collection and processing. *Acta Crystallogr A Found Adv* **71**:353–360.  
15 doi:10.1107/S2053273315010669
- 16 Hattne J, Shi D, de la Cruz MJ, Reyes FE, Gonen T. 2016. Modeling truncated pixel values of faint  
17 reflections in MicroED images. *J Appl Crystallogr* **49**:1029–1034.  
18 doi:10.1107/S1600576716007196
- 19 Hattne J, Shi D, Glynn C, Zee C-T, Gallagher-Jones M, Martynowycz MW, Rodriguez JA, Gonen T. 2018.  
20 Analysis of Global and Site-Specific Radiation Damage in Cryo-EM. *Structure* **26**:759–766.e4.  
21 doi:10.1016/j.str.2018.03.021
- 22 Hunte C, Richers S. 2008. Lipids and membrane protein structures. *Current opinion in structural biology*  
23 **18**:406–411.
- 24 Jiang Q-X, Gonen T. 2012. The influence of lipids on voltage-gated ion channels. *Current opinion in*  
25 *structural biology* **22**:529–536.
- 26 Kabsch W. 2010a. XDS. *Acta Crystallogr D Biol Crystallogr* **66**:125–132. doi:10.1107/S0907444909047337
- 27 Kabsch W. 2010b. Integration, scaling, space-group assignment and post-refinement. *Acta Crystallogr D*  
28 *Biol Crystallogr* **66**:133–144. doi:10.1107/S0907444909047374
- 29 Landau EM, Rosenbusch JP. 1996. Lipidic cubic phases: a novel concept for the crystallization of  
30 membrane proteins. *Proceedings of the National Academy of Sciences* **93**:14532–14535.
- 31 Li X, Zhang S, Zhang J, Sun F. 2018. In situ protein micro-crystal fabrication by cryo-FIB for electron  
32 diffraction. *Biophys Rep* **4**:339–347. doi:10.1007/s41048-018-0075-x
- 33 Liu S, Gonen T. 2018. MicroED structure of the NaK ion channel reveals a Na<sup>+</sup> partition process into the  
34 selectivity filter. *Communications biology* **1**:1–6.

- 1 Martynowycz MW, Glynn C, Miao J, Jason de la Cruz M, Hattne J, Shi D, Cascio D, Rodriguez J, Gonen T.  
2 2017. MicroED Structures from Micrometer Thick Protein Crystals (preprint). *Biochemistry*.  
3 doi:10.1101/152504
- 4 Martynowycz MW, Gonen T. 2020. Efficient, high-throughput ligand incorporation into protein  
5 microcrystals by on-grid soaking (preprint). *Biochemistry*. doi:10.1101/2020.05.25.115246
- 6 Martynowycz MW, Zhao W, Hattne J, Jensen GJ, Gonen T. 2019a. Collection of Continuous Rotation  
7 MicroED Data from Ion Beam-Milled Crystals of Any Size. *Structure* **27**:545-548.e2.  
8 doi:10.1016/j.str.2018.12.003
- 9 Martynowycz MW, Zhao W, Hattne J, Jensen GJ, Gonen T. 2019b. Qualitative Analyses of Polishing and  
10 Precoating FIB Milled Crystals for MicroED. *Structure* **27**:1594-1600.e2.  
11 doi:10.1016/j.str.2019.07.004
- 12 McCoy AJ, Grosse-Kunstleve RW, Adams PD, Winn MD, Storoni LC, Read RJ. 2007. *Phaser*  
13 crystallographic software. *J Appl Crystallogr* **40**:658–674. doi:10.1107/S0021889807021206
- 14 Meins T, Vonrhein C, Zeth K. 2008. Crystallization and preliminary X-ray crystallographic studies of  
15 human voltage-dependent anion channel isoform I (HVDAC1). *Acta Crystallographica Section F:*  
16 *Structural Biology and Crystallization Communications* **64**:651–655.
- 17 Nannenga BL, Shi D, Hattne J, Reyes FE, Gonen T. 2014a. Structure of catalase determined by MicroED.  
18 *eLife* **3**:e03600. doi:10.7554/eLife.03600
- 19 Nannenga BL, Shi D, Leslie AGW, Gonen T. 2014b. High-resolution structure determination by  
20 continuous-rotation data collection in MicroED. *Nat Methods* **11**:927–930.  
21 doi:10.1038/nmeth.3043
- 22 Polovinkin V, Khakurel K, Babiak M, Angelov B, Schneider B, Dohnalek J, Andreasson J, Hajdu J. 2020.  
23 Demonstration of electron diffraction from membrane protein crystals grown in a lipidic  
24 mesophase after lamella preparation by focused ion beam milling at cryogenic temperatures  
25 (preprint). *Biophysics*. doi:10.1101/2020.07.03.186049
- 26 Ravelli RB, Nijpels FJ, Henderikx RJ, Weissenberger G, Thewessem S, Gijsbers A, Beulen BW, López-  
27 Iglesias C, Peters PJ. 2020. Cryo-EM structures from sub-nl volumes using pin-printing and jet  
28 vitrification. *Nature communications* **11**:1–9.
- 29 Rostovtseva TK, Bezrukov SM. 2008. VDAC regulation: role of cytosolic proteins and mitochondrial lipids.  
30 *Journal of bioenergetics and biomembranes* **40**:163.
- 31 Schindelin J, Arganda-Carreras I, Frise E, Kaynig V, Longair M, Pietzsch T, Preibisch S, Rueden C, Saalfeld  
32 S, Schmid B, Tinevez J-Y, White DJ, Hartenstein V, Eliceiri K, Tomancak P, Cardona A. 2012. Fiji:  
33 an open-source platform for biological-image analysis. *Nat Methods* **9**:676–682.  
34 doi:10.1038/nmeth.2019
- 35 Schredelseker J, Paz A, López CJ, Altenbach C, Leung CS, Drexler MK, Chen J-N, Hubbell WL, Abramson J.  
36 2014. High resolution structure and double electron-electron resonance of the zebrafish

- 1 voltage-dependent anion channel 2 reveal an oligomeric population. *Journal of Biological*  
2 *Chemistry* **289**:12566–12577.
- 3 Shi D, Nannenga BL, de la Cruz MJ, Liu J, Sawtelle S, Calero G, Reyes FE, Hattne J, Gonen T. 2016. The  
4 collection of MicroED data for macromolecular crystallography. *Nature Protocols* **11**:895–904.
- 5 Shi D, Nannenga BL, Iadanza MG, Gonen T. 2013. Three-dimensional electron crystallography of protein  
6 microcrystals. *eLife* **2**:e01345. doi:10.7554/eLife.01345
- 7 Tan YZ, Rubinstein JL. 2020. Through-grid wicking enables high-speed cryoEM specimen preparation.  
8 *bioRxiv*.
- 9 The PyMOL molecular graphics system. 2014. . Schrödinger LLC.
- 10 Ujwal R, Abramson J. 2012. High-throughput crystallization of membrane proteins using the lipidic  
11 bicelle method. *JoVE (Journal of Visualized Experiments)* e3383.
- 12 Ujwal R, Cascio D, Colletier J-P, Faham S, Zhang J, Toro L, Ping P, Abramson J. 2008. The crystal structure  
13 of mouse VDAC1 at 2.3 Å resolution reveals mechanistic insights into metabolite gating.  
14 *Proceedings of the National Academy of Sciences* **105**:17742–17747.
- 15 Wolff AM, Young ID, Sierra RG, Brewster AS, Martynowycz MW, Nango E, Sugahara M, Nakane T, Ito K,  
16 Aquila A, Bhowmick A, Biel JT, Carbajo S, Cohen AE, Cortez S, Gonzalez A, Hino T, Im D, Koralek  
17 JD, Kubo M, Lazarou TS, Nomura T, Owada S, Samelson AJ, Tanaka T, Tanaka R, Thompson EM,  
18 van den Bedem H, Woldeyes RA, Yumoto F, Zhao W, Tono K, Boutet S, Iwata S, Gonen T, Sauter  
19 NK, Fraser JS, Thompson MC. 2020. Comparing serial X-ray crystallography and microcrystal  
20 electron diffraction (MicroED) as methods for routine structure determination from small  
21 macromolecular crystals. *IUCr* **7**:306–323. doi:10.1107/S205225252000072X
- 22 Yonekura K, Kato K, Ogasawara M, Tomita M, Toyoshima C. 2015. Electron crystallography of ultrathin  
23 3D protein crystals: atomic model with charges. *Proceedings of the National Academy of*  
24 *Sciences* **112**:3368–3373.
- 25 Zhao J, Xu H, Carroni M, Lebrette H, Walldén K, Moe A, Matsuoka R, Högbom M, Zou X. 2019. A simple  
26 pressure-assisted method for cryo-EM specimen preparation. *bioRxiv* 665448.
- 27 Zhou H, Luo Z, Li X. 2019. Using focus ion beam to prepare crystal lamella for electron diffraction.  
28 *Journal of Structural Biology* **205**:59–64. doi:10.1016/j.jsb.2019.02.004
- 29 Zhu L, Bu G, Jing L, Shi D, Lee M-Y, Gonen T, Liu W, Nannenga BL. 2020a. Structure Determination from  
30 Lipidic Cubic Phase Embedded Microcrystals by MicroED. *Structure* S0969212620302392.  
31 doi:10.1016/j.str.2020.07.006
- 32 Zhu L, Bu G, Jing L, Shi D, Lee M-Y, Gonen T, Liu W, Nannenga BL. 2020b. Structure determination from  
33 lipidic cubic phase embedded microcrystals by MicroED. *Structure*.
- 34

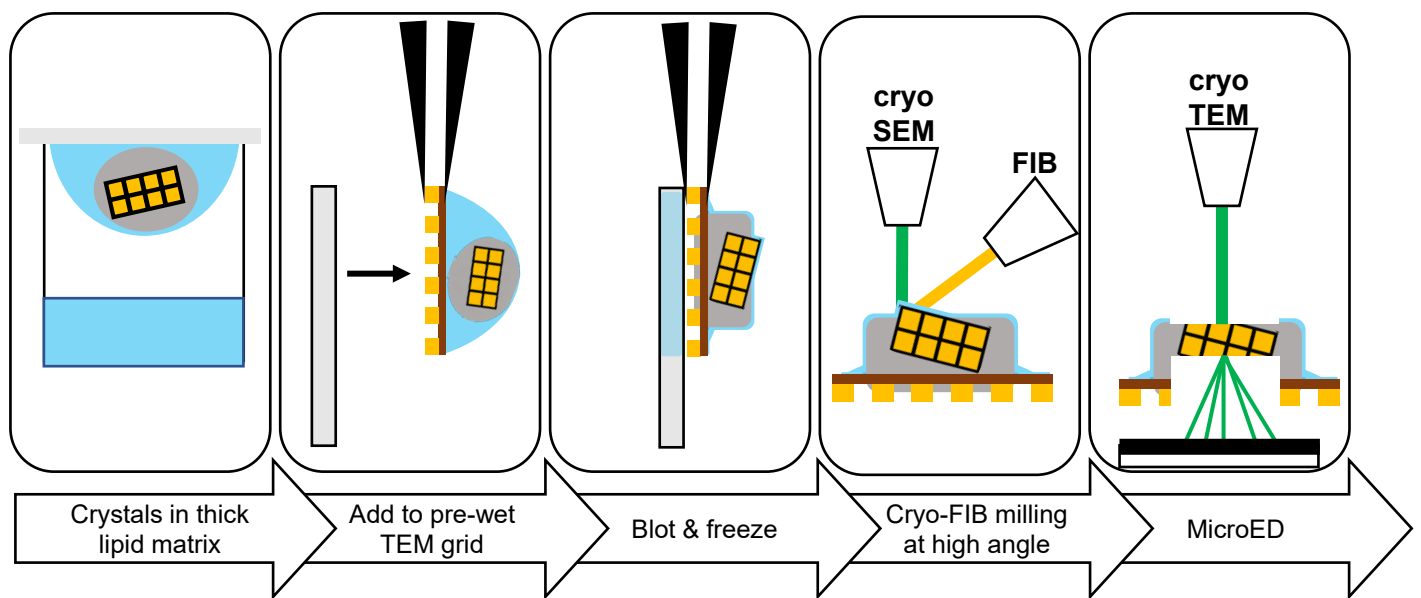

**Figure 1**



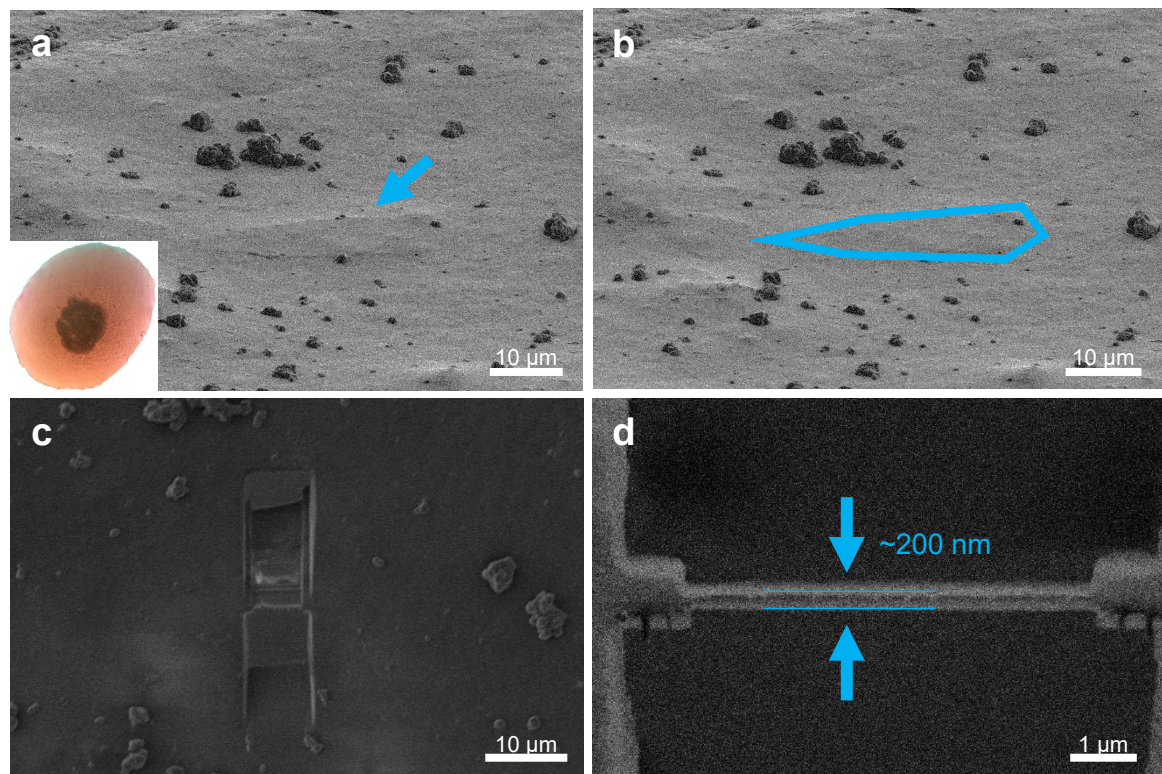

**Figure 2**

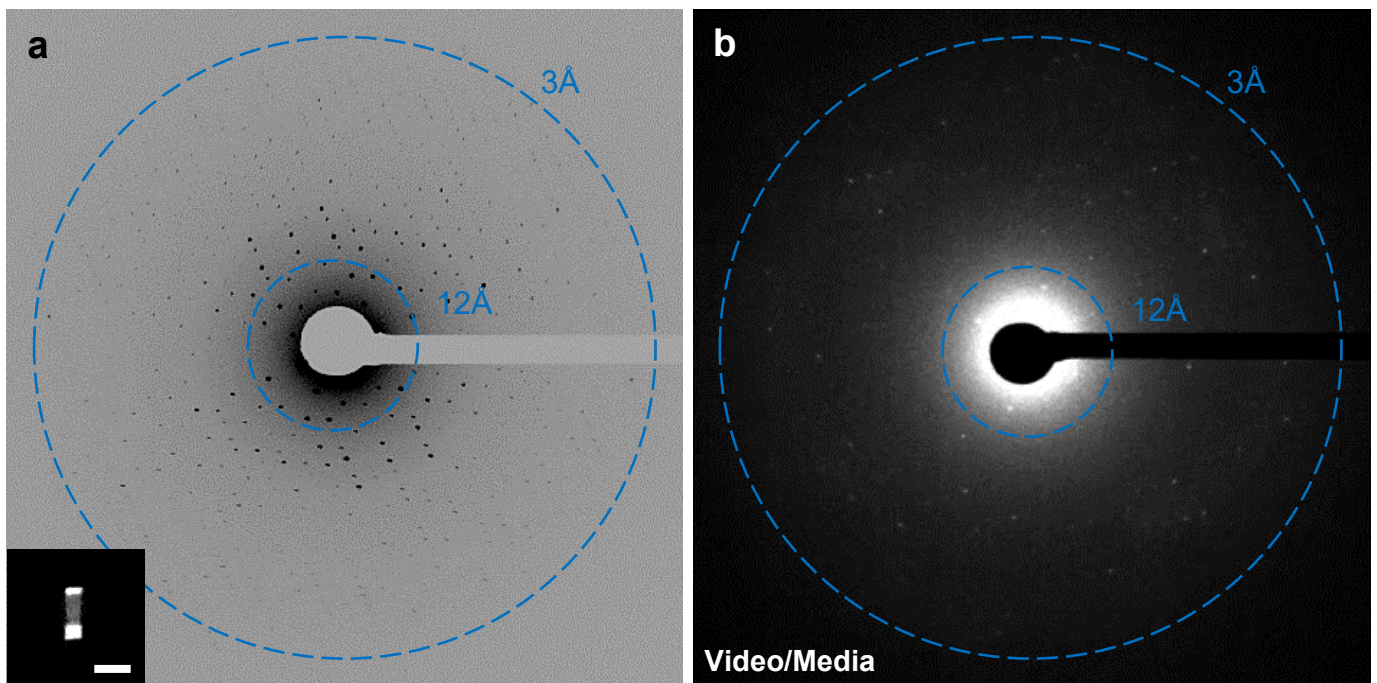

**Figure 3**

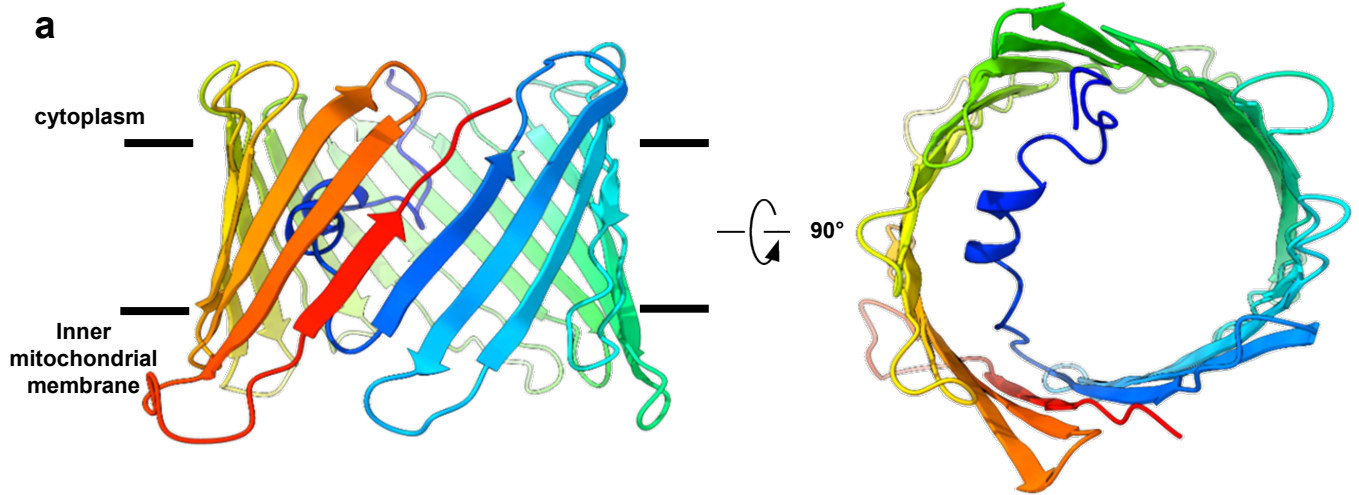

**b**

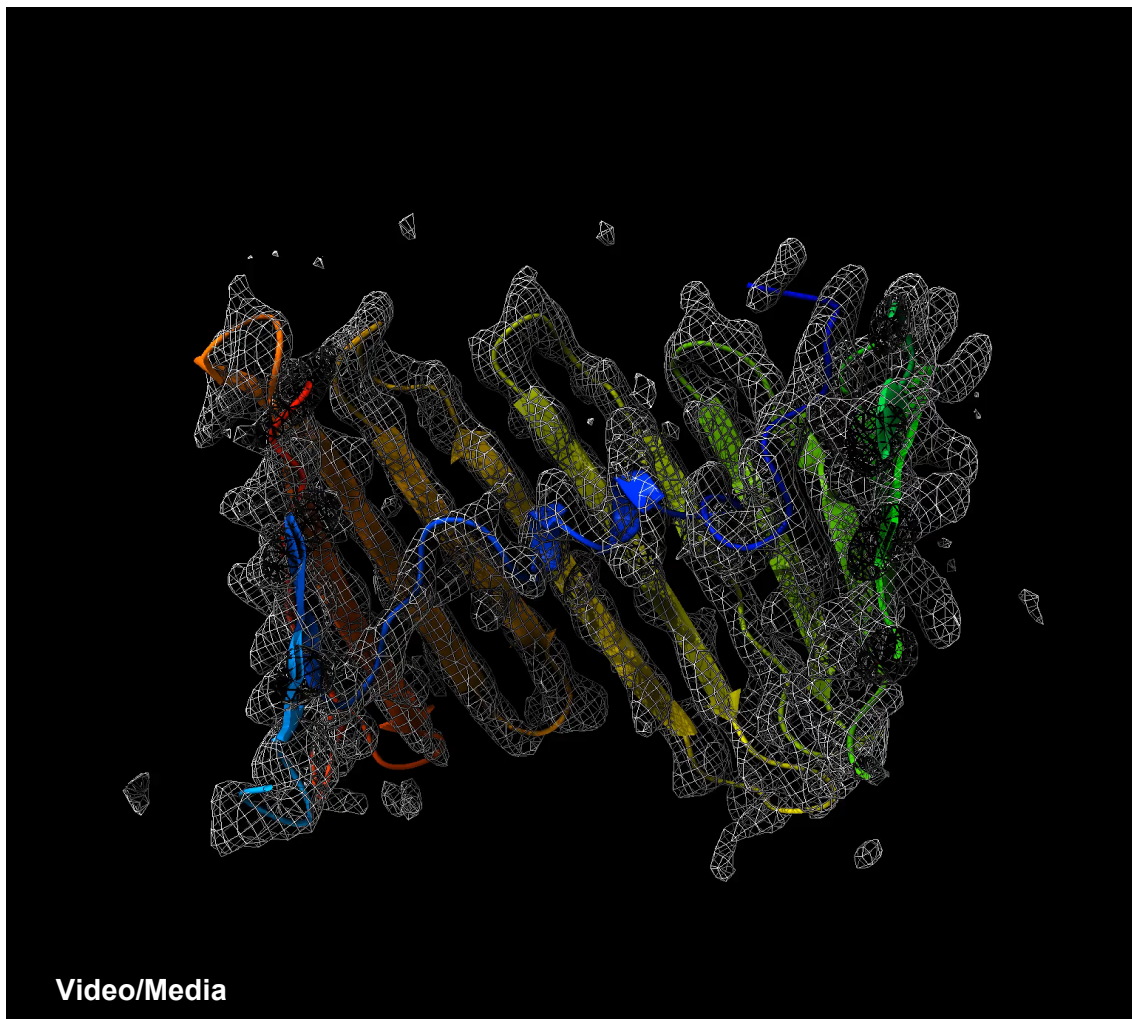

**Figure 4**



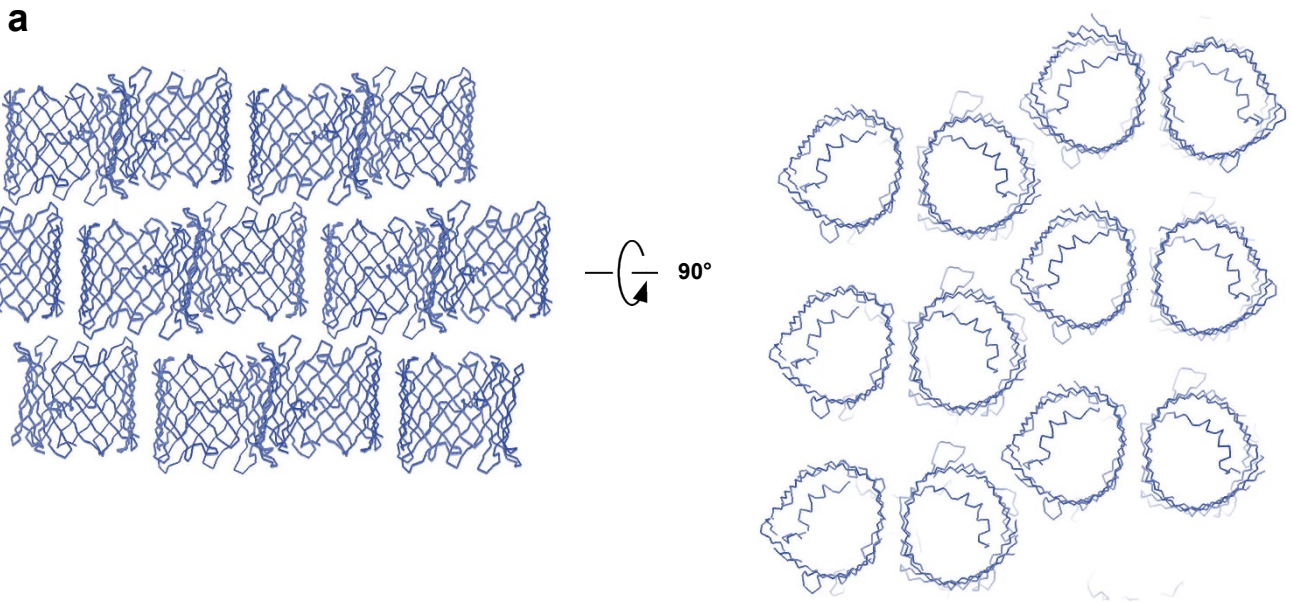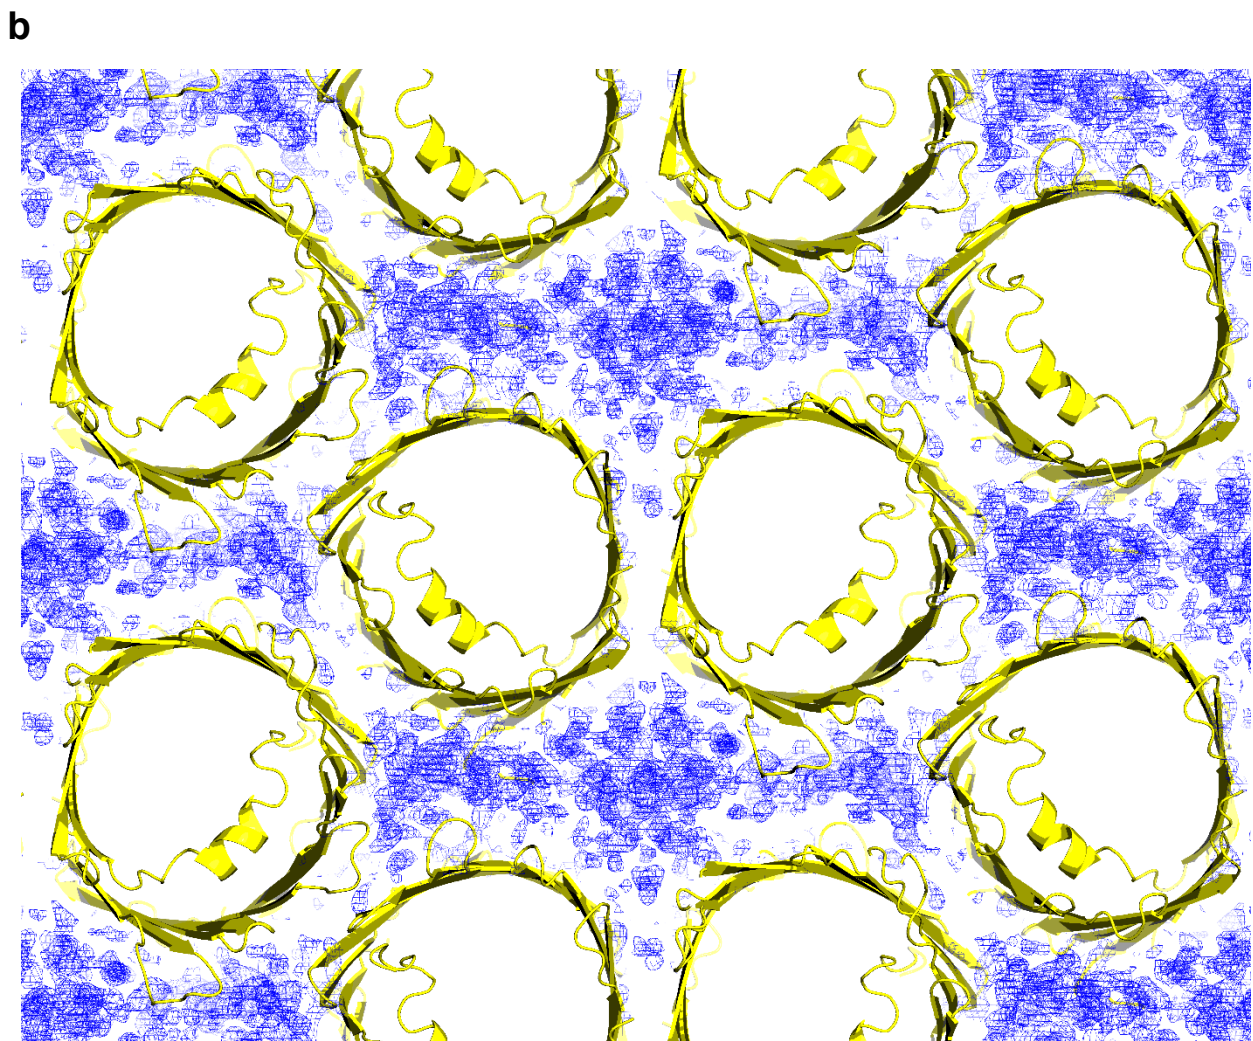

**Figure 5**

**Table 1.** MicroED Crystallographic table

|                        |                                       | mVDAC            |
|------------------------|---------------------------------------|------------------|
| Integration Statistics | Wavelength (Å)                        | 0.0197           |
|                        | Resolution range (Å)                  | 29.1 - 3.1       |
|                        | Space group                           | C 1 2 1          |
|                        | Unit cell (a, b, c) (Å)               | 98.9, 58.2, 69.5 |
|                        | ( $\alpha$ , $\beta$ , $\gamma$ ) (°) | 90.0, 99.4, 90.0 |
|                        | Total reflections (#)                 | 32641            |
|                        | Multiplicity                          | 5.8              |
|                        | Completeness (%)                      | 80.1             |
|                        | Mean I/ $\sigma$ (I)                  | 2.29             |
|                        | R-pim                                 | 0.22             |
| CC <sub>1/2</sub>      | 0.92                                  |                  |
| Refinement Statistics  | R-work                                | 0.255            |
|                        | R-free                                | 0.274            |
|                        | Protein residues (#)                  | 283              |
|                        | RMS(bonds)                            | 0.004            |
|                        | RMS(angles)                           | 0.68             |
|                        | Ramachandran favored (%)              | 87.19            |
|                        | Ramachandran allowed (%)              | 11.03            |
|                        | Ramachandran outliers (%)             | 1.78             |
|                        | Rotamer outliers (%)                  | 24.24            |
| Clashscore             | 5.79                                  |                  |



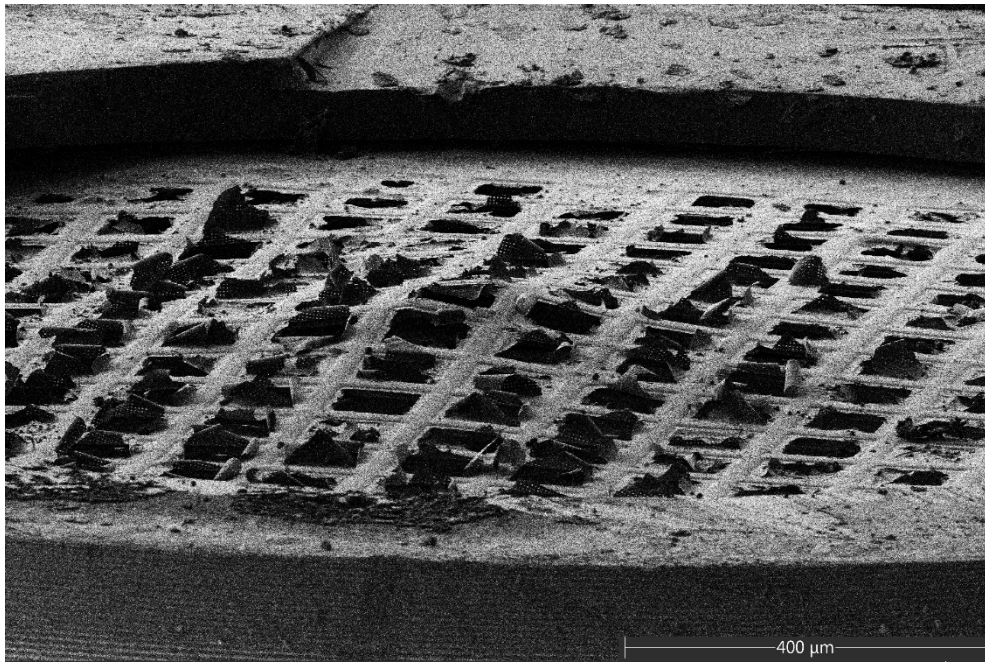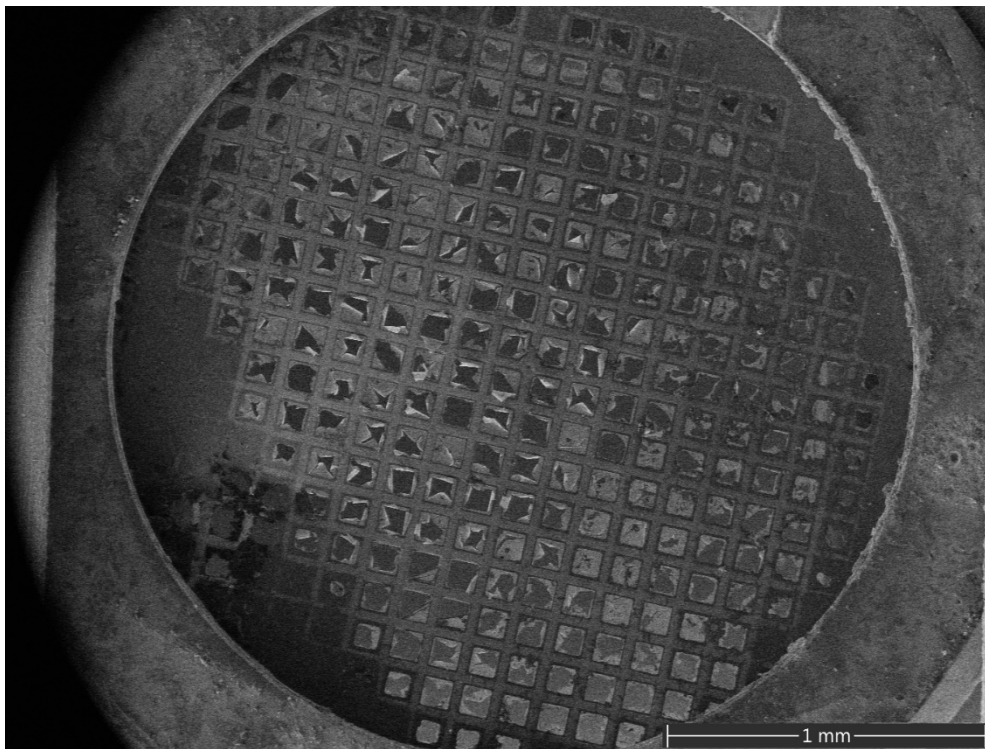

**Figure S1:** The grid was blotted in a vitrobot from both the front and back. Most windows were broken, and no usable areas were identified



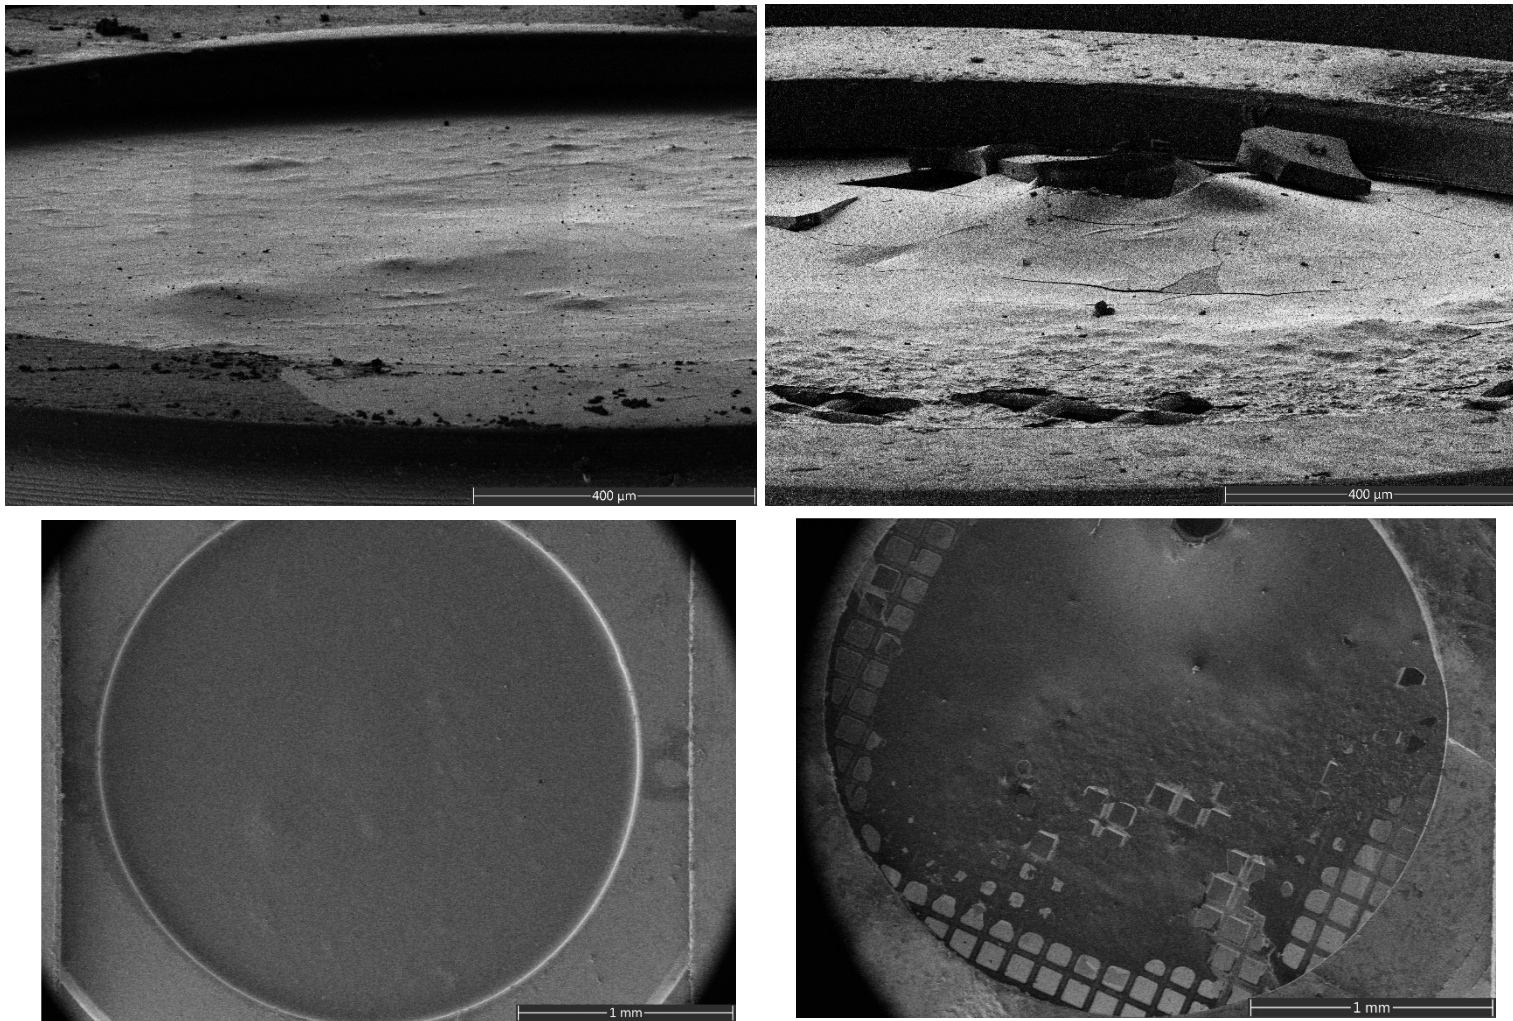

**Figure S2:** The entire viscous crystallization drop was pipettes onto the grid. No rinsing and blotted from the back only. A uniform thick layer of material was observed by no areas that clearly appeared to contain crystals identified.

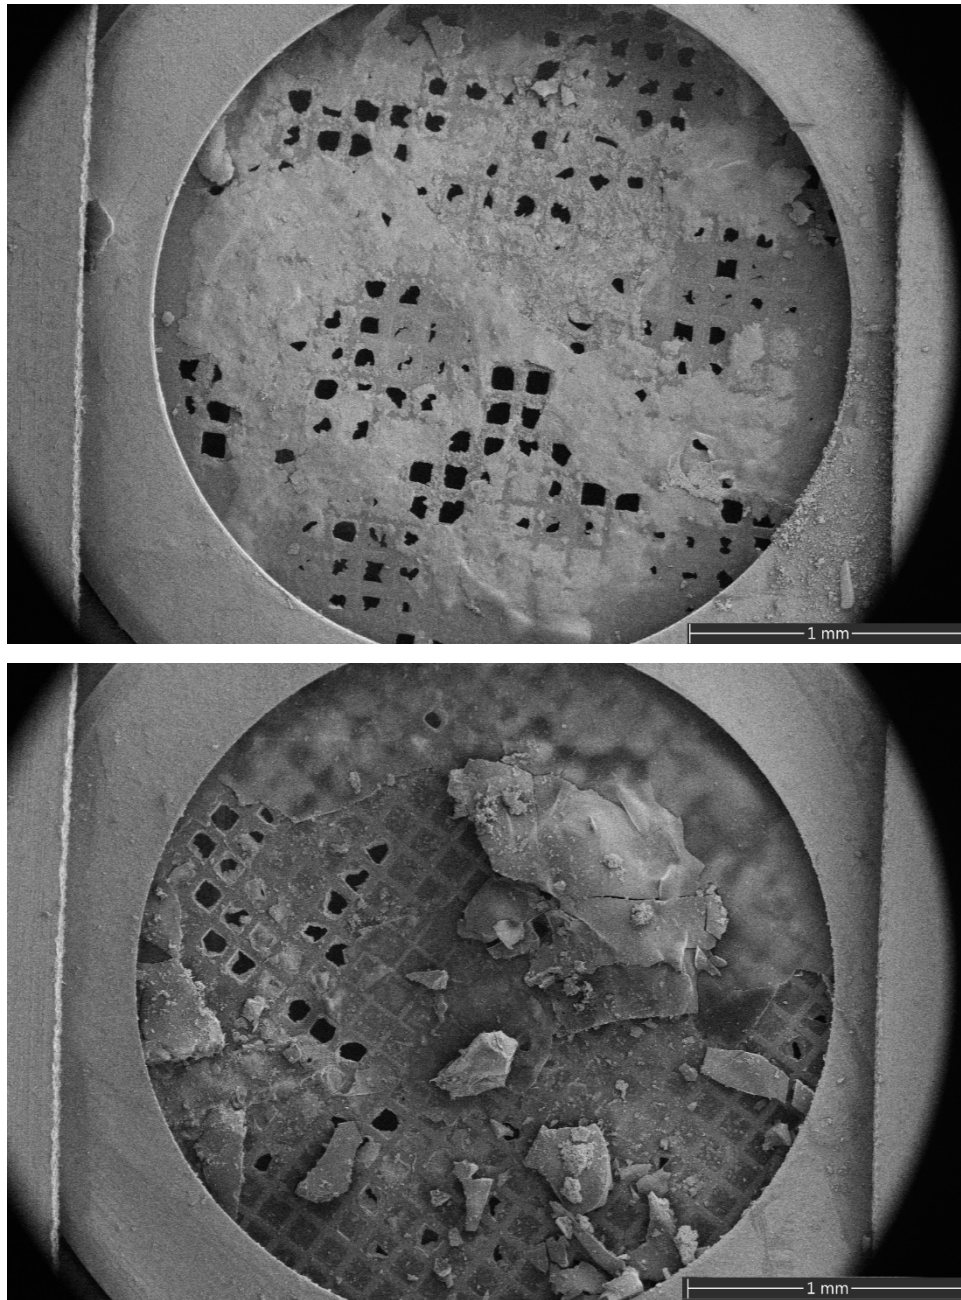

**Figure S3:** The entire viscous crystallization drop pipettes onto the grid and blotted from the front only and plunged into liquid nitrogen. Many windows appeared broken while the majority of the grid was covered in thick areas of ice.



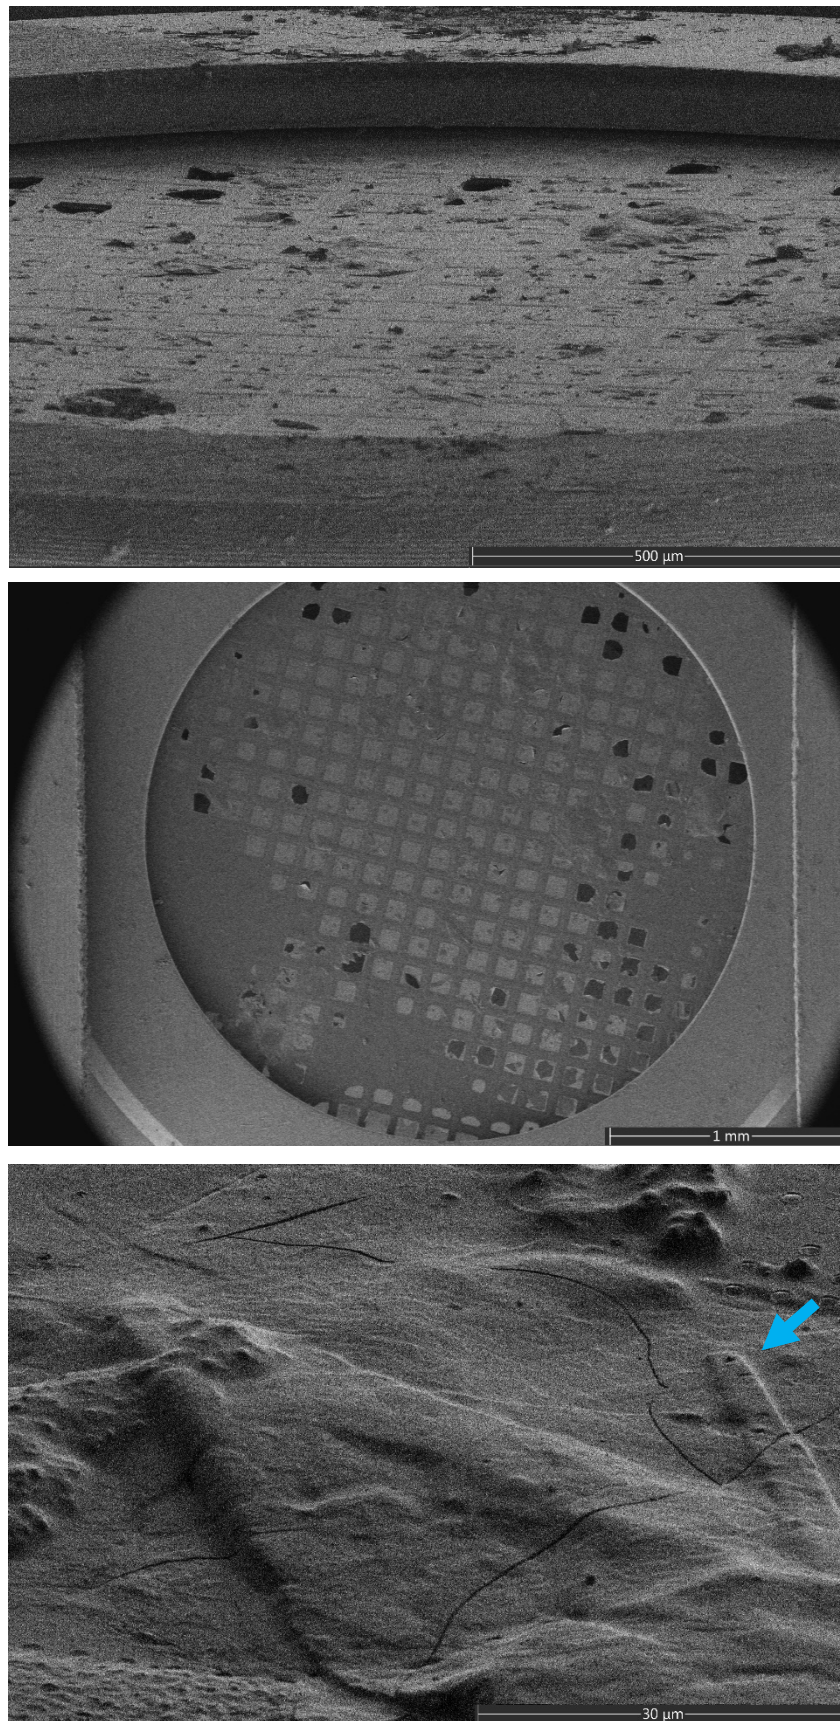

**Figure S4:** The viscous crystallization drop was applied to the grid with low humidity and blotted from the back before plunging into ethane. Most windows appeared intact and some areas that may be crystalline were identified (arrow). The combination of back blotting and ethane improved the preparation. No data could be obtained from this grid.



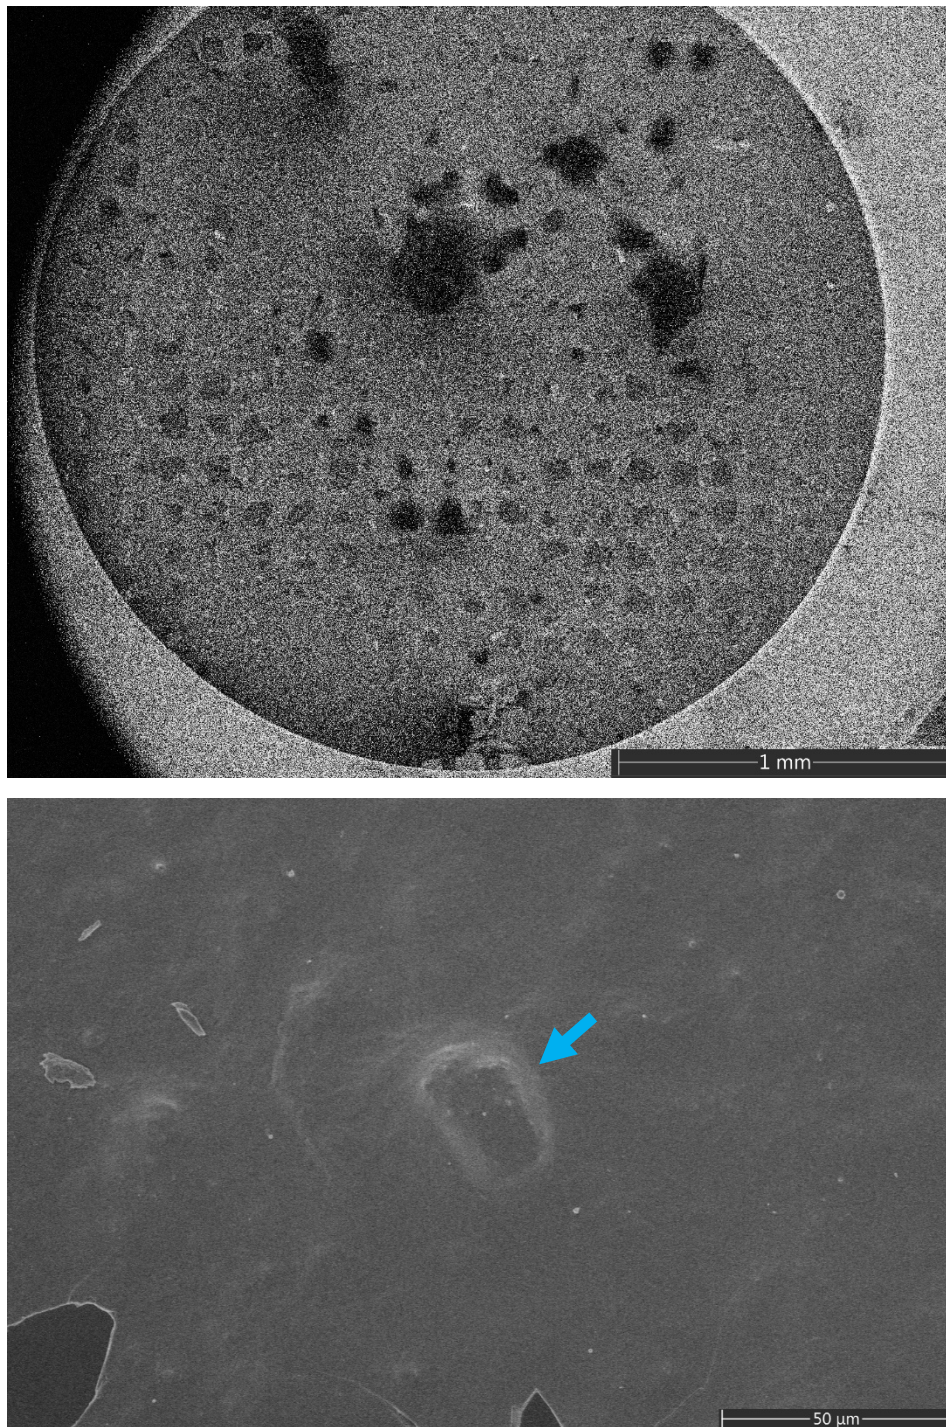

**Figure S5:** The viscous crystallization drop was applied to the pre wetted grid. The vitrobot was set to low humidity and at room temperature and blotting was done from the back followed by plunging into ethane. The grid was covered uniformly with the crystalline solution and at high magnification items consistent with crystals could be identified (arrow). This preparation yielded low resolution data (~8Å)



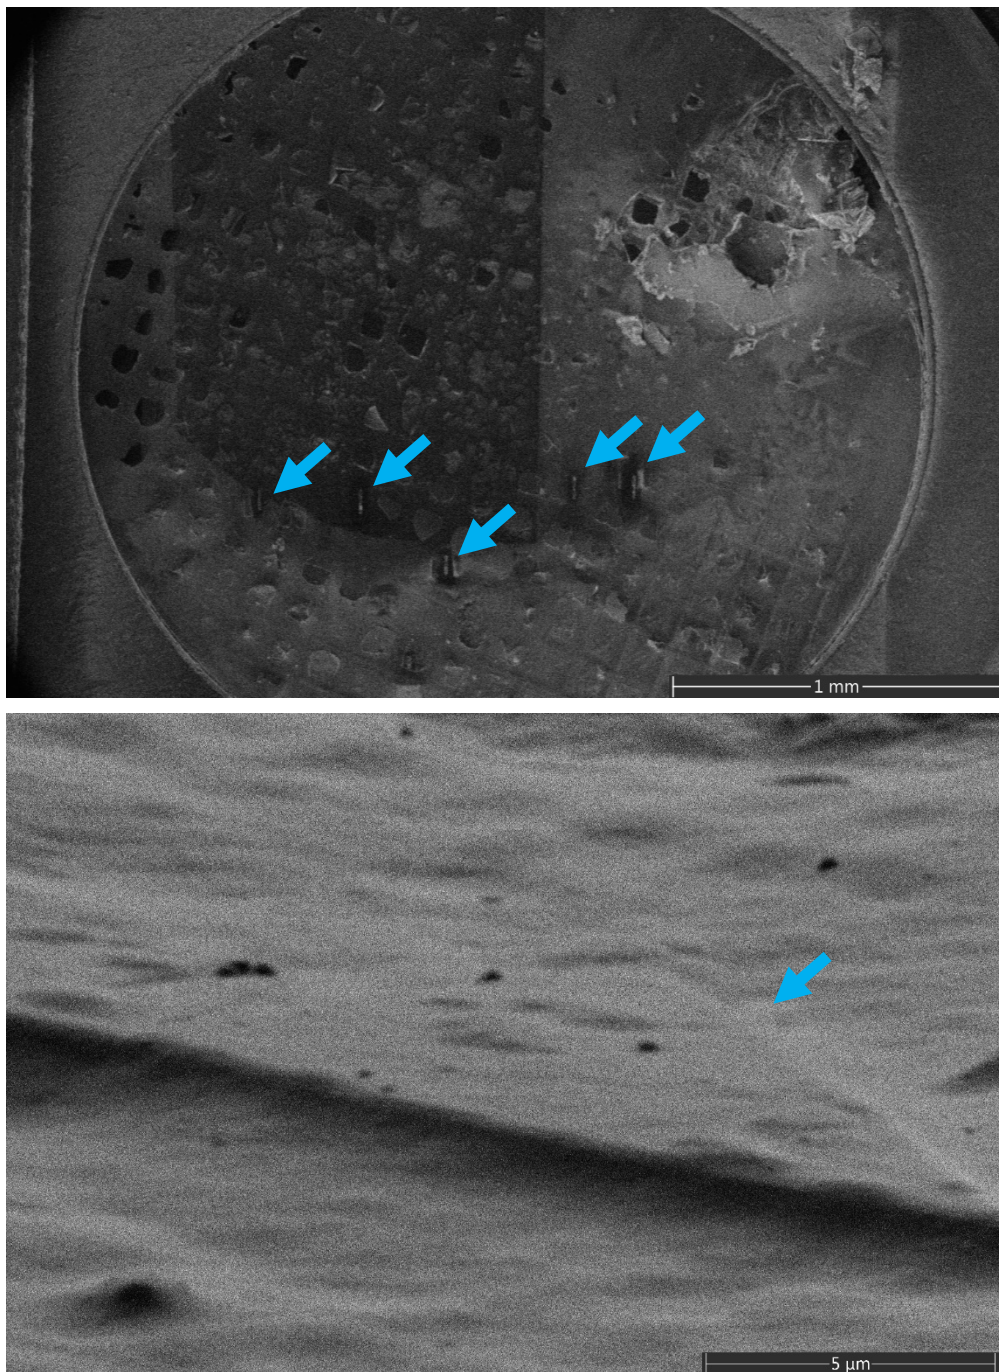

**Figure S6:** The viscous crystallization drop was applied to the pre wetted grid. The vitrobot was set to low humidity and to 4 degrees C and blotting was done from the back followed by plunging into ethane. The grid was covered with the crystalline solution and at high magnification items consistent with crystals could be identified (arrow). This preparation yielded higher resolution data (~4Å)



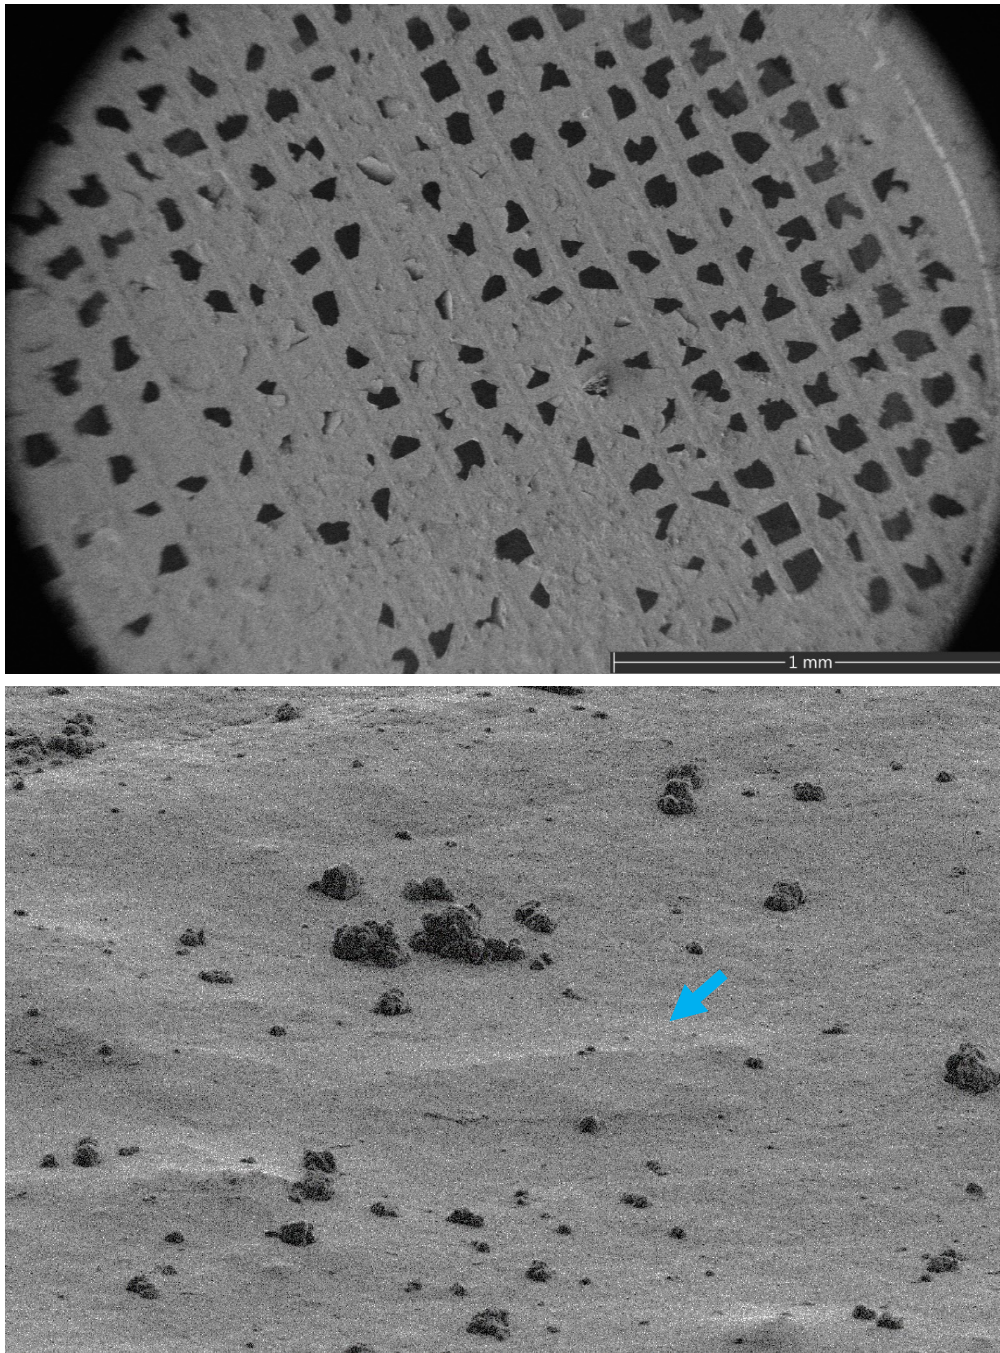

**Figure S7:** The viscous crystallization drop was applied to the pre wetted grid. The vitrobot was set to 90% humidity and to 4 degrees C and blotting was done from the back followed by plunging into ethane. Although some windows were broken, the grid had many intact windows that were covered with the crystalline solution and at high magnification items crystals could be identified (arrow). This preparation yielded the best data after milling (~3A)

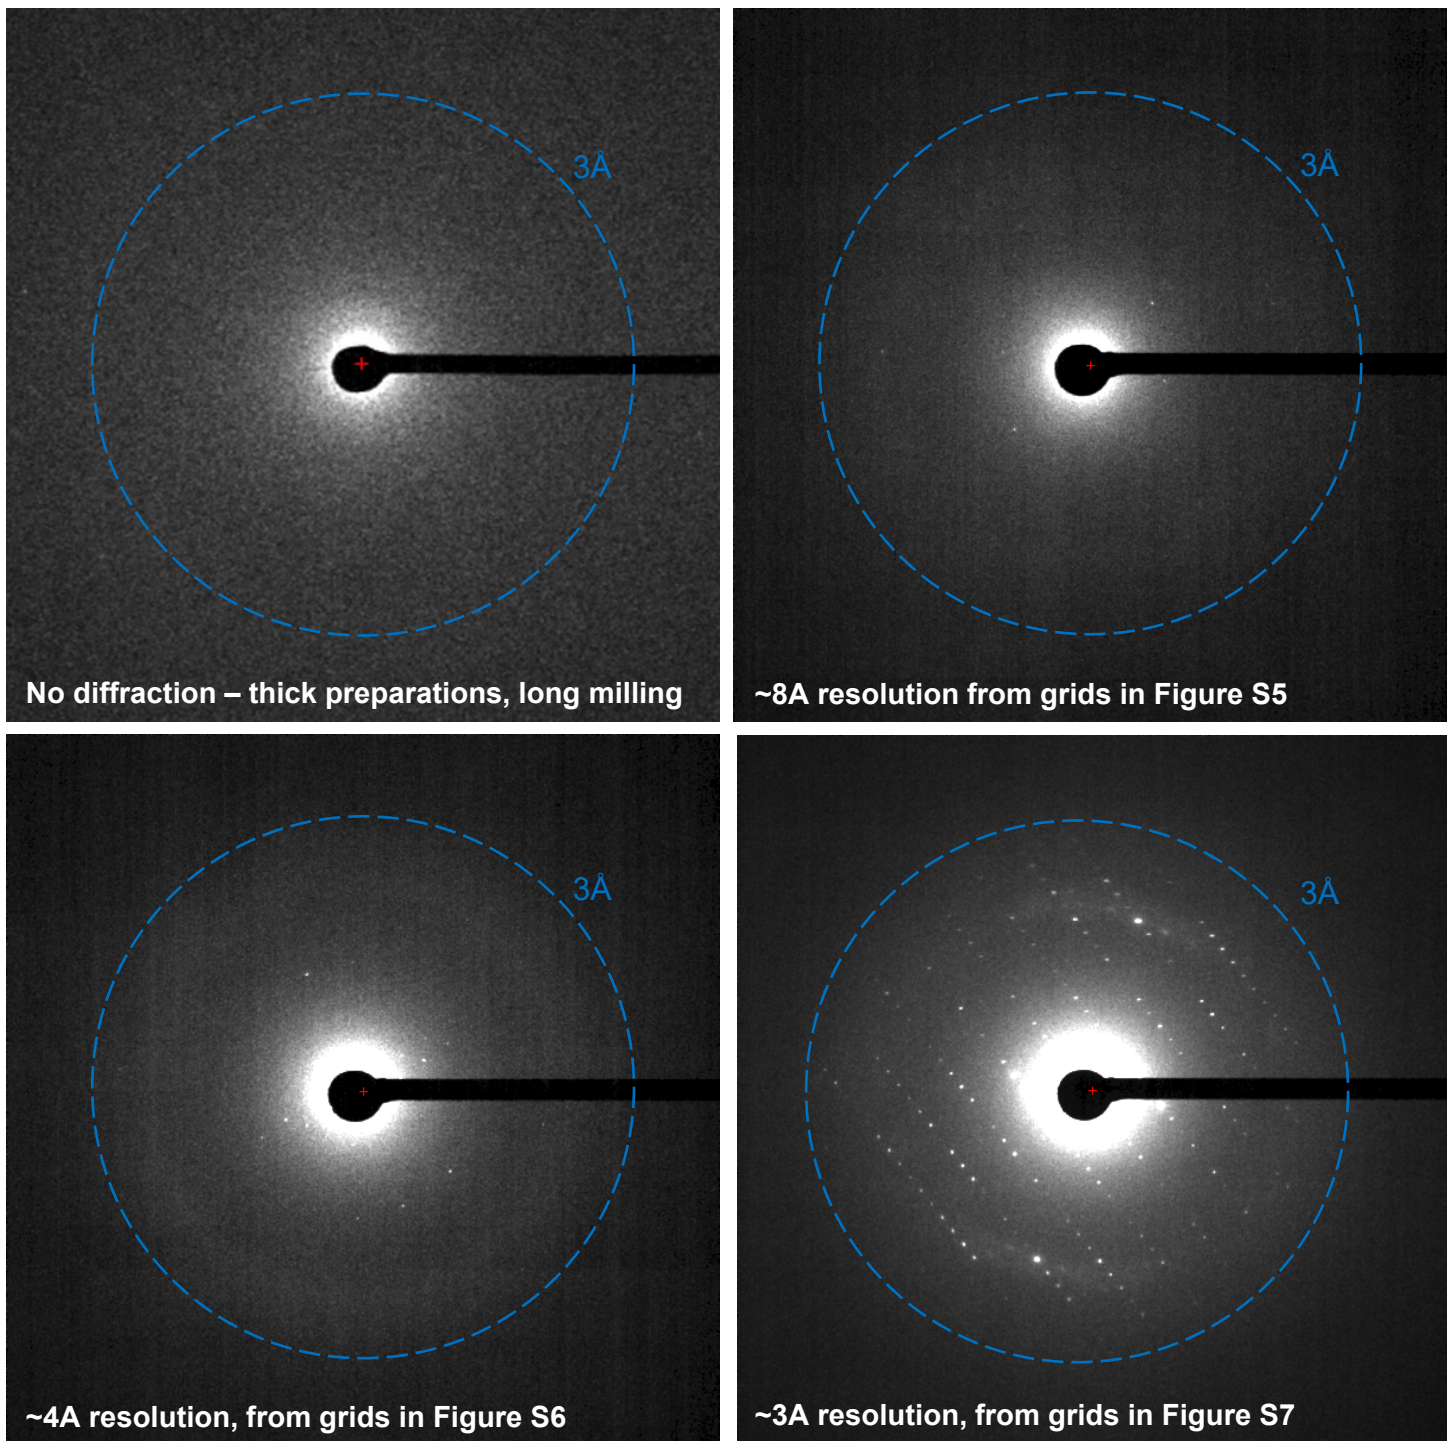

**Figure S8:** Progression in diffraction quality as grid preparation method improved. The best data at ~3Å resolution was obtained from grids that were prepared using pre-wet grids held at 90% humidity, 4 degrees C, back blotted and plunged into ethane.



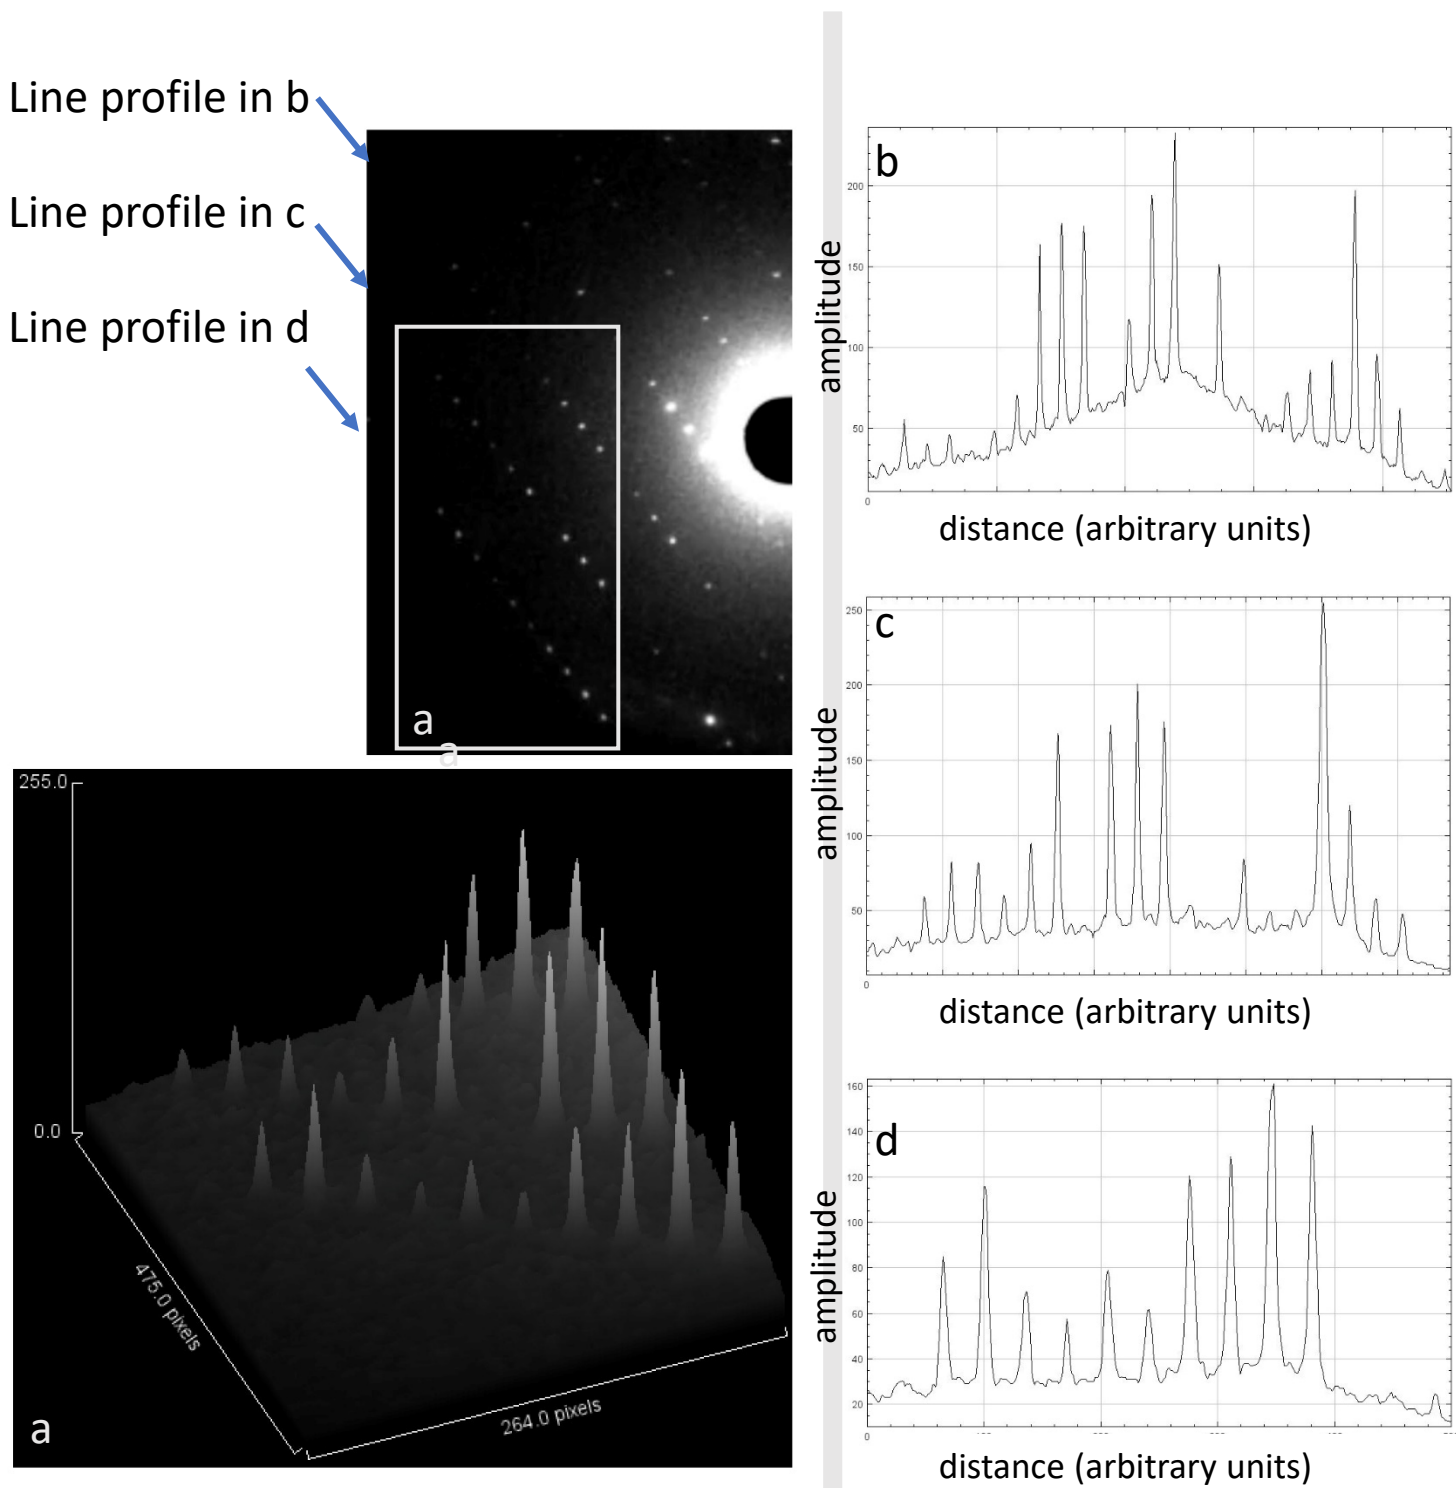

**Figure S9:** Quality of the MicroED data obtained from ~200nm lamella of membrane protein crystals embedded in a thick lipid matrix. This data was obtained from the crystal shown in Figure 2 of the main text
